# Supplementary material for: Direct substitution of benzylic alcohols with electron-deficient benzenethiols via π-benzylpalladium(ii) in water
Source: Royal Society of Chemistry journal article supplement (doi:10.1039/c5ob01717c), 2015-01-01

## Supporting Information

### Direct substitution of benzylic alcohols with electron-deficient benzenethiols via $\pi$ -benzylpalladium(II) in water

Hidemasa Hikawa,\* Mariko Toyomoto, Shoko Kikkawa, and Isao Azumaya\*

*Faculty of Pharmaceutical Sciences, Toho University, Funabashi, Chiba 274-8510, Japan*

*hidemasa.hikawa@phar.toho-u.ac.jp and isao.azumaya @phar.toho-u.ac.jp*

|                                                                                       |               |
|---------------------------------------------------------------------------------------|---------------|
| <b>1. Table of contents</b>                                                           | <b>S1</b>     |
| <b>2. Table 1, Entry 9 (<sup>1</sup>H NMR analysis of the crude product)</b>          | <b>S2</b>     |
| <b>3. Hammett study</b>                                                               | <b>S3</b>     |
| <b>4. Control experiment (Scheme 6A)</b>                                              | <b>S4</b>     |
| <b>5. Control experiment (Scheme 6B)</b>                                              | <b>S5-S6</b>  |
| <b>6. Copies of <sup>1</sup>H and <sup>13</sup>C NMR spectra of the new compounds</b> | <b>S7-S26</b> |

**Table 1, Entry 9** (The yield was determined by <sup>1</sup>H NMR analysis of the crude product using *p*-nitroanisole as an internal standard.)

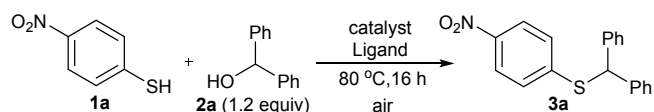

A mixture of 4-nitrobenzenethiol **1a** (155.4 mg, 1 mmol), PdCl<sub>2</sub>(MeCN)<sub>2</sub> (13.0 mg, 0.05 mmol), TPPMS (36.7 mg, 0.1 mmol), and benzhydrol **2a** (221.6 mg, 1.2 mmol) in H<sub>2</sub>O (4 mL) was heated at 80 °C in a sealed tube under air. After the reaction mixture was cooled, *p*-nitroanisole (153.3 mg, 1 mmol, internal standard) was added to the reaction mixture, which was extracted with CDCl<sub>3</sub> (8 mL), then the organic layer was analyzed by <sup>1</sup>H-NMR spectroscopy.

Conversion yield was calculated by integration.

|                  | desired <b>3a</b>          | <i>p</i> -nitroanisole <b>internal standard</b> |
|------------------|----------------------------|-------------------------------------------------|
| Signal $\delta$  | 5.74 (methine - <b>H</b> ) | 6.97 (Ar- <b>H</b> )                            |
| Integral value   | 0.89 (1H)                  | 2.00 (2H)                                       |
| Calculated ratio | 89% from <b>1a</b>         | 153 mg (1 mmol)                                 |

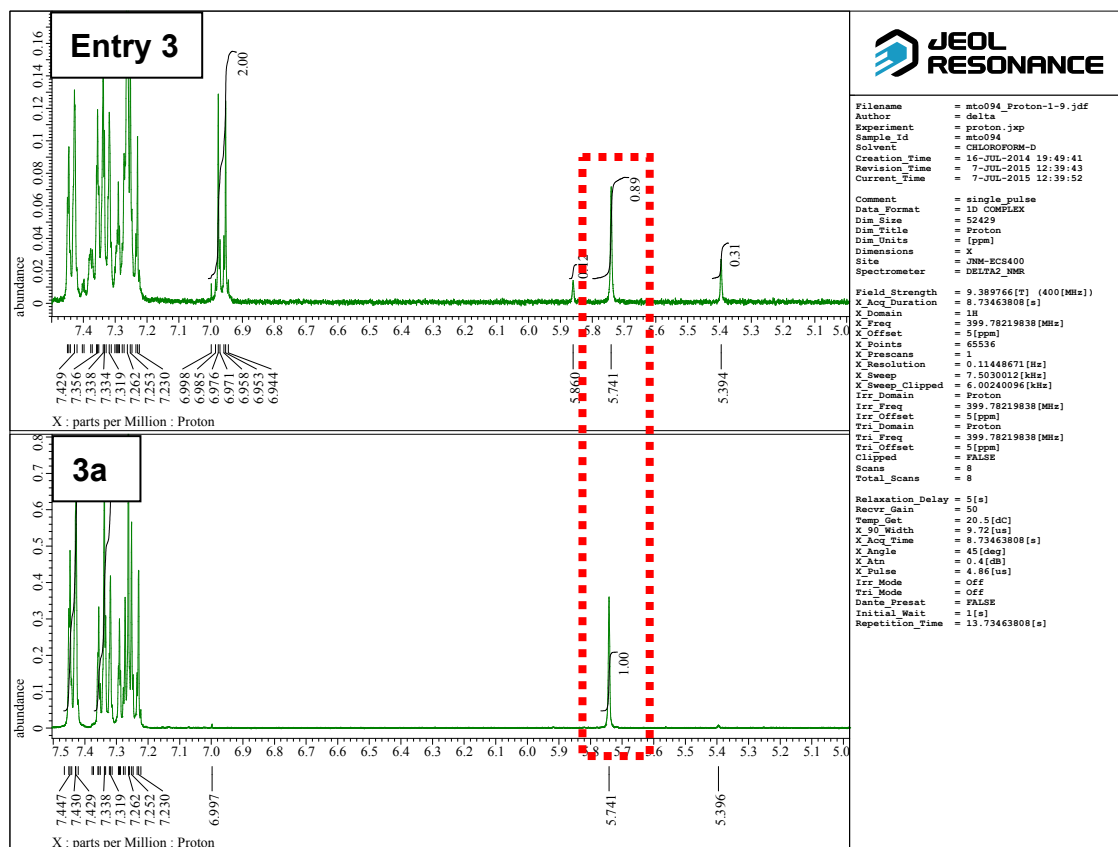

## Hammett study

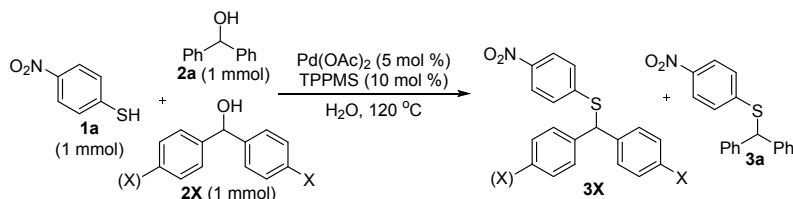

A mixture of 4-nitrobenzenethiol **1a** (155.4 mg, 1 mmol),  $\text{Pd}(\text{OAc})_2$  (11.7 mg, 0.05 mmol), TPPMS (36.7 mg, 0.1 mmol), benzhydryl alcohols **2X** (1 mmol), and benzhydryl alcohol **2a** (184.8 mg, 1 mmol) in  $\text{H}_2\text{O}$  (4 mL) was heated at  $120\text{ }^\circ\text{C}$  in a sealed tube under air. After the reaction mixture was cooled, *p*-nitroanisole (153 mg, 1 mmol, internal standard) was added to the reaction mixture, which was extracted with  $\text{CDCl}_3$  (8 mL), then the organic layer was analyzed by  $^1\text{H-NMR}$  spectroscopy.

|                   | $\sigma$ | $\log(k_X/k_H)$ |
|-------------------|----------|-----------------|
| <b>3b</b> (diOMe) | -0.268   | 1.14            |
| <b>3d</b> (Me)    | -0.17    | 0.70            |
| <b>3c</b> (diF)   | 0.062    | -0.034          |
| <b>3a</b> (H)     | 0        | 0               |
| <b>3e</b> (Cl)    | 0.227    | -0.46           |

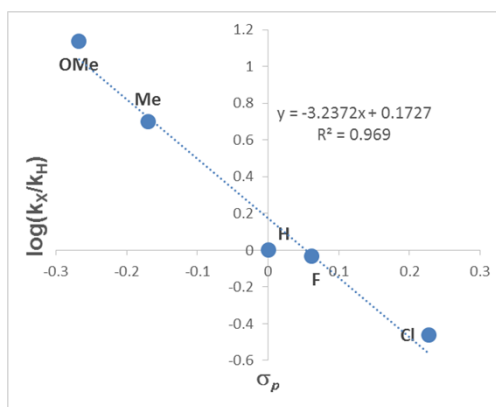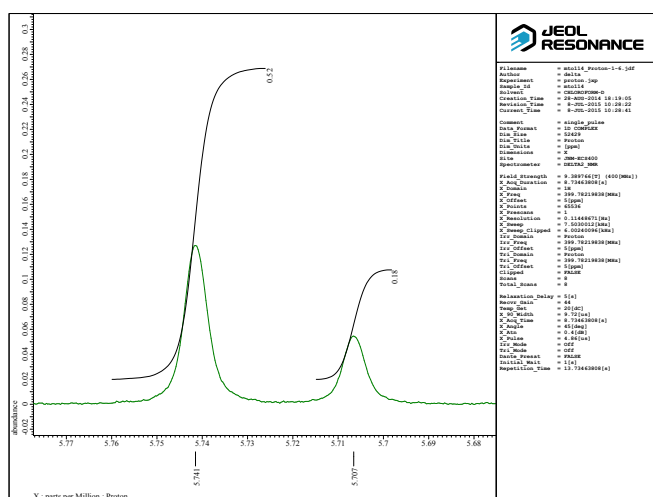

X=H, **3a**

[methine-H] (1H)

$\delta$ : 5.74 ppm

Integrate: 0.52

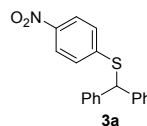

X=Cl, **3e**

[methine-H] (1H)

$\delta$ : 5.71 ppm

Integrate: 0.18

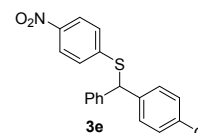

$$\log(k_X/k_H) = \log(0.18/0.52) = -0.46$$

### Control experiment (Scheme 6A)

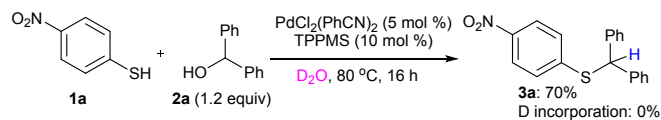

A mixture of 4-nitrobenzenethiol **1a** (77 mg, 0.5 mmol), PdCl<sub>2</sub>(MeCN)<sub>2</sub> (6.5 mg, 0.025 mmol), sodium diphenylphosphinobenzene-3-sulfonate (TPPMS, 18 mg, 0.05 mmol), and benzhydrol **2a** (110 mg, 0.6 mmol), in D<sub>2</sub>O (1.5 mL) was heated at 80 °C for 16 h in a sealed tube under air. After cooling, the reaction mixture was poured into water and extracted with EtOAc. The organic layer was washed with brine, dried over MgSO<sub>4</sub> and concentrated in vacuo. The residue was purified by flash column chromatography (silica gel, hexanes/EtOAc) to give desired product **3a** (112 mg, 0.35 mmol, 70%).

|                 |                      |                          |
|-----------------|----------------------|--------------------------|
| Signal $\delta$ | 8.01 (Ar- <b>H</b> ) | 5.74 (methin- <b>H</b> ) |
| Integral value  | 2.0 (2H)             | 1.0 (1H)                 |

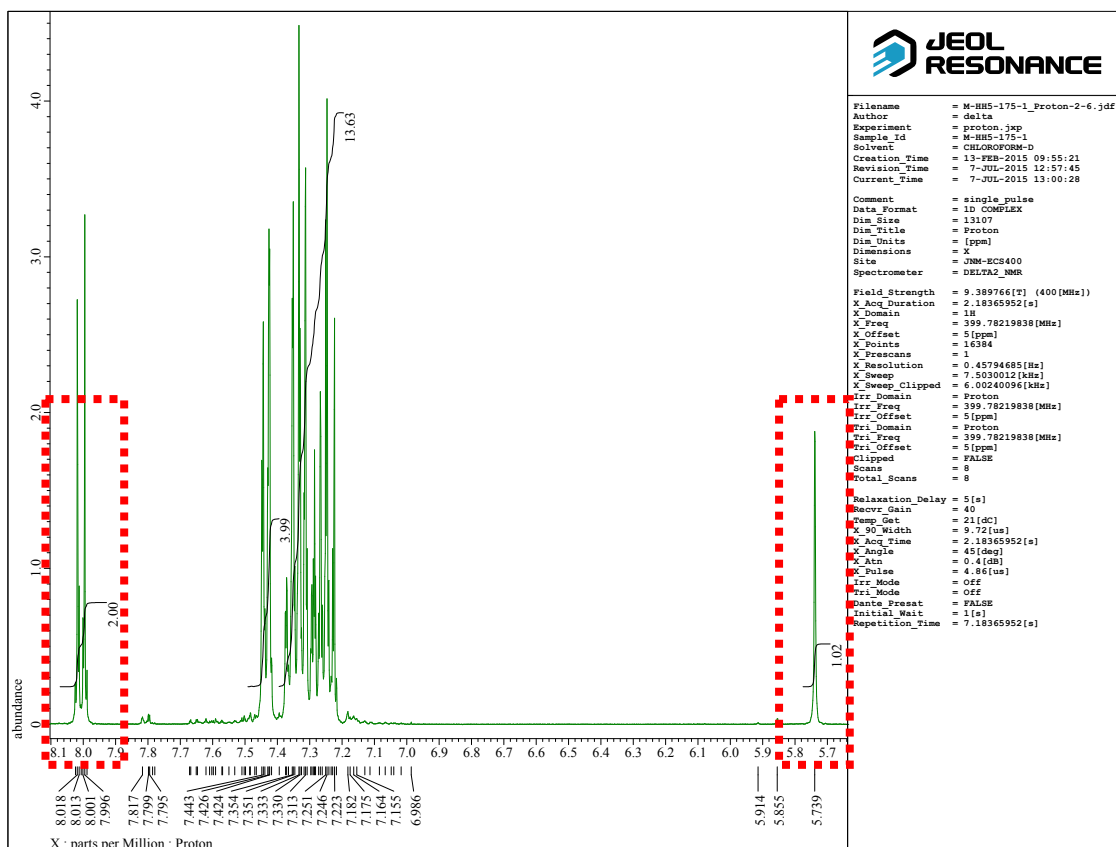

### Control experiment (Scheme 6B)

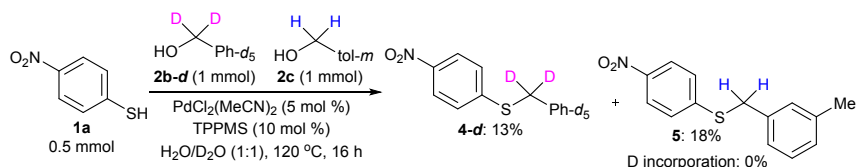

A mixture of 4-nitrobenzenethiol **1a** (77 mg, 0.5 mmol),  $\text{PdCl}_2(\text{MeCN})_2$  (6.5 mg, 0.025 mmol), sodium diphenylphosphinobenzene-3-sulfonate (TPPMS, 18 mg, 0.05 mmol), and benzyl alcohol- $d_7$  **2b-d** (114 mg, 1 mmol), and 3-methylbenzyl alcohol **2c** (122 mg, 1 mmol), in  $\text{H}_2\text{O}$  (2 mL) was heated at 120 °C for 16 h in a sealed tube under air. After cooling, the reaction mixture was poured into water and extracted with EtOAc. The organic layer was washed with brine, dried over  $\text{MgSO}_4$  and concentrated in vacuo. The residue was purified by flash column chromatography and PTLC (silica gel, hexanes/EtOAc) to give desired product **4-d** (16 mg, 0.063 mmol, 13%) and **5** (23 mg, 0.09 mmol, 18%), respectively.

|                 |                      |                              |
|-----------------|----------------------|------------------------------|
| Signal $\delta$ | 8.01 (Ar- <b>H</b> ) | 4.22 (methylene - <b>H</b> ) |
| Integral value  | 2.0 (2H)             | 2.0 (2H)                     |

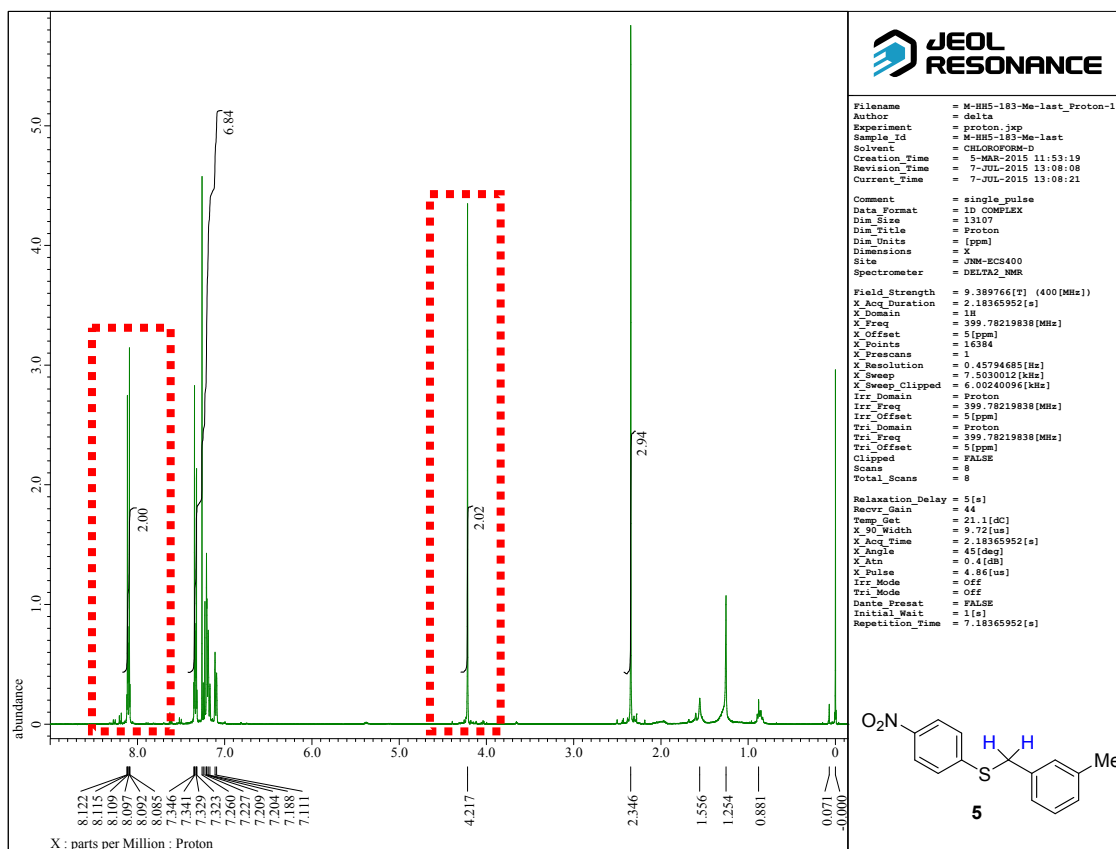

|                 |                      |                            |
|-----------------|----------------------|----------------------------|
| Signal $\delta$ | 8.01 (Ar- <u>H</u> ) | 4.2 (methylene- <u>H</u> ) |
| Integral value  | 2.0 (2H)             | Not detected (2H)          |

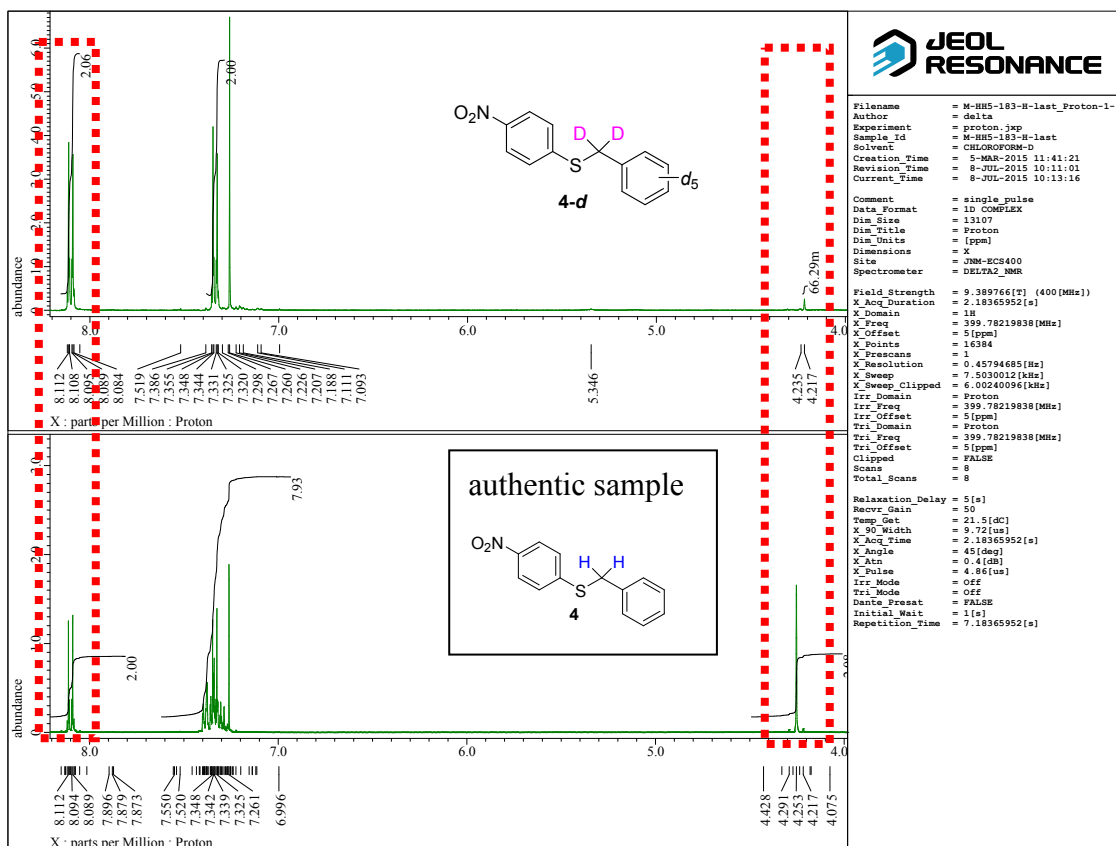

MS (EI):  $m/z$  (%) 252 ( $M^+$ , 14.0), 98 (100).

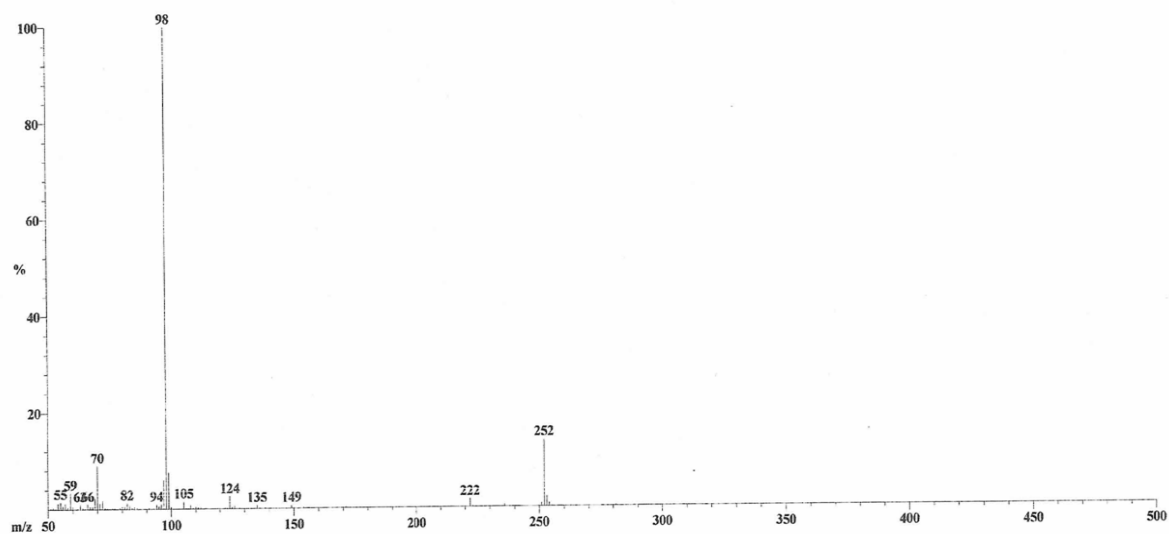

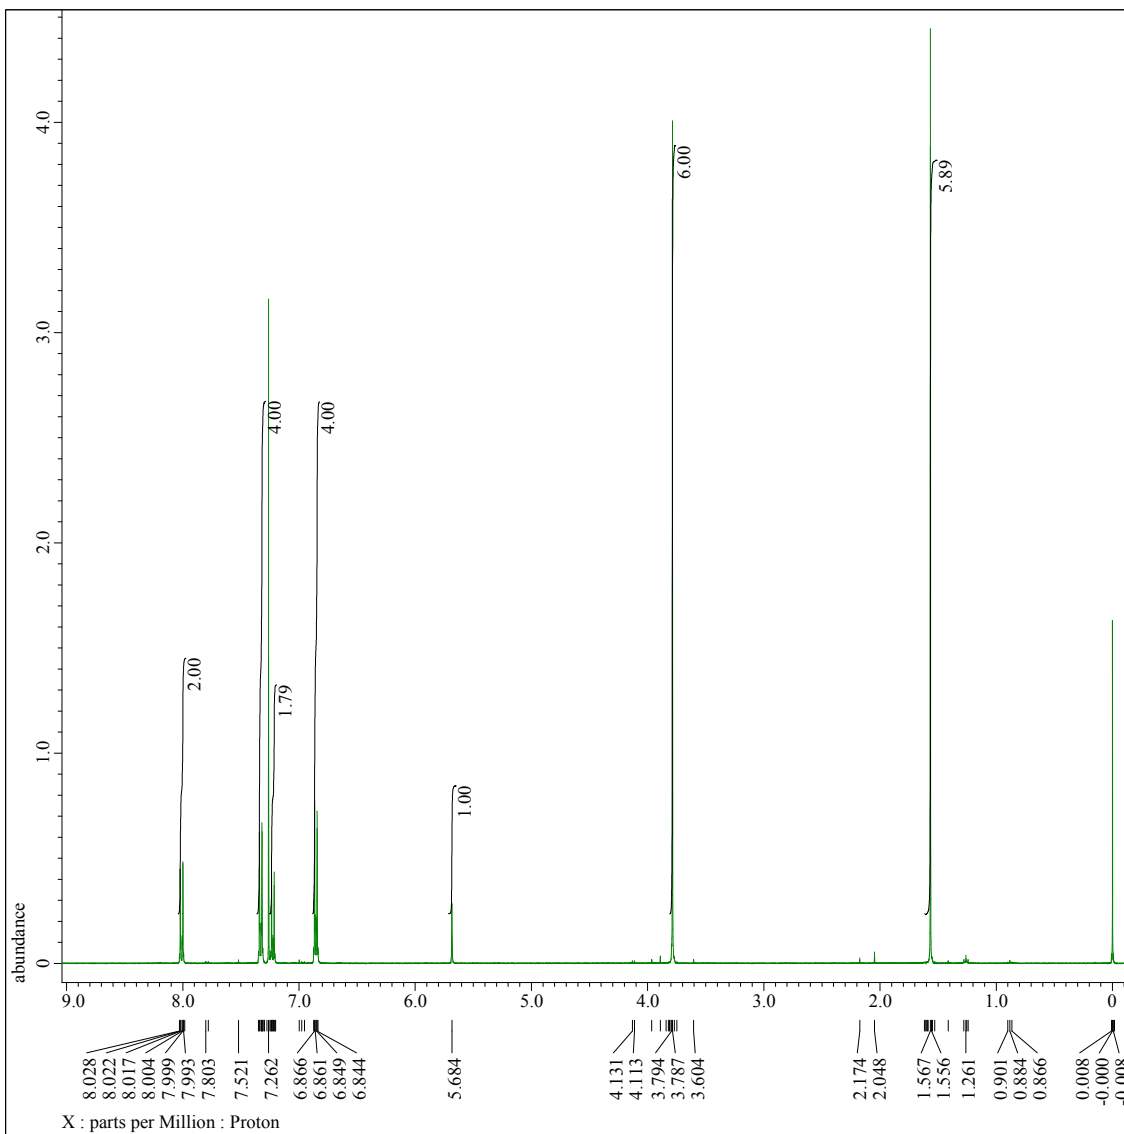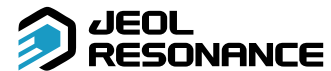

```

Filename      = MTO082-2ND-6^8_Proton-1-8.
Author       = delta
Experiment   = proton.jxp
Sample Id    = MTO082-2ND-6^8
Solvent      = CHLOROFORM-D
Creation Time = 20-JUN-2014 17:49:07
Revision Time = 7-JUL-2015 14:06:21
Current Time  = 7-JUL-2015 14:06:44

Comment      = single_pulse
Data Format   = 1D_COMPLEX
Dim Size     = 52429
Dim Title    = Proton
Dim Units    = [ppm]
Dimensions   = X
Site         = JNM-ECS400
Spectrometer = DELTA2_NMR

Field Strength = 9.389766[T] (400[MHz])
X Acq Duration = 8.73463808[s]
X Domain       = 1H
X Freq         = 399.78219838[MHz]
X Offset       = 5[ppm]
X Points       = 65536
X Prescans     = 1
X Resolution   = 0.11448671[Hz]
X Sweep        = 7.5030012[kHz]
X Sweep Clipped = 6.00240096[kHz]
Irr Domain     = Proton
Irr Freq       = 399.78219838[MHz]
Irr Offset     = 5[ppm]
Tri Domain     = Proton
Tri Freq       = 399.78219838[MHz]
Tri Offset     = 5[ppm]
Clipped        = FALSE
Scans          = 8
Total Scans    = 8

Relaxation_Delay = 5[s]
Recvr Gain       = 48
Temp Get         = 20.8[dC]
X 90 Width      = 9.72[us]
X Acq Time       = 8.73463808[s]
X Angle          = 45[deg]
X Atn           = 0.4[dB]
X Pulse         = 4.86[us]
Irr Mode         = Off
Tri Mode         = Off
Dante Presat    = FALSE
Initial Wait     = 1[s]
Repetition Time = 13.73463808[s]

```

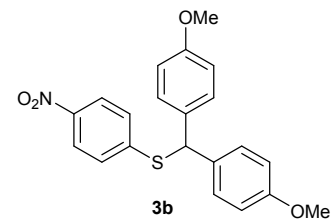

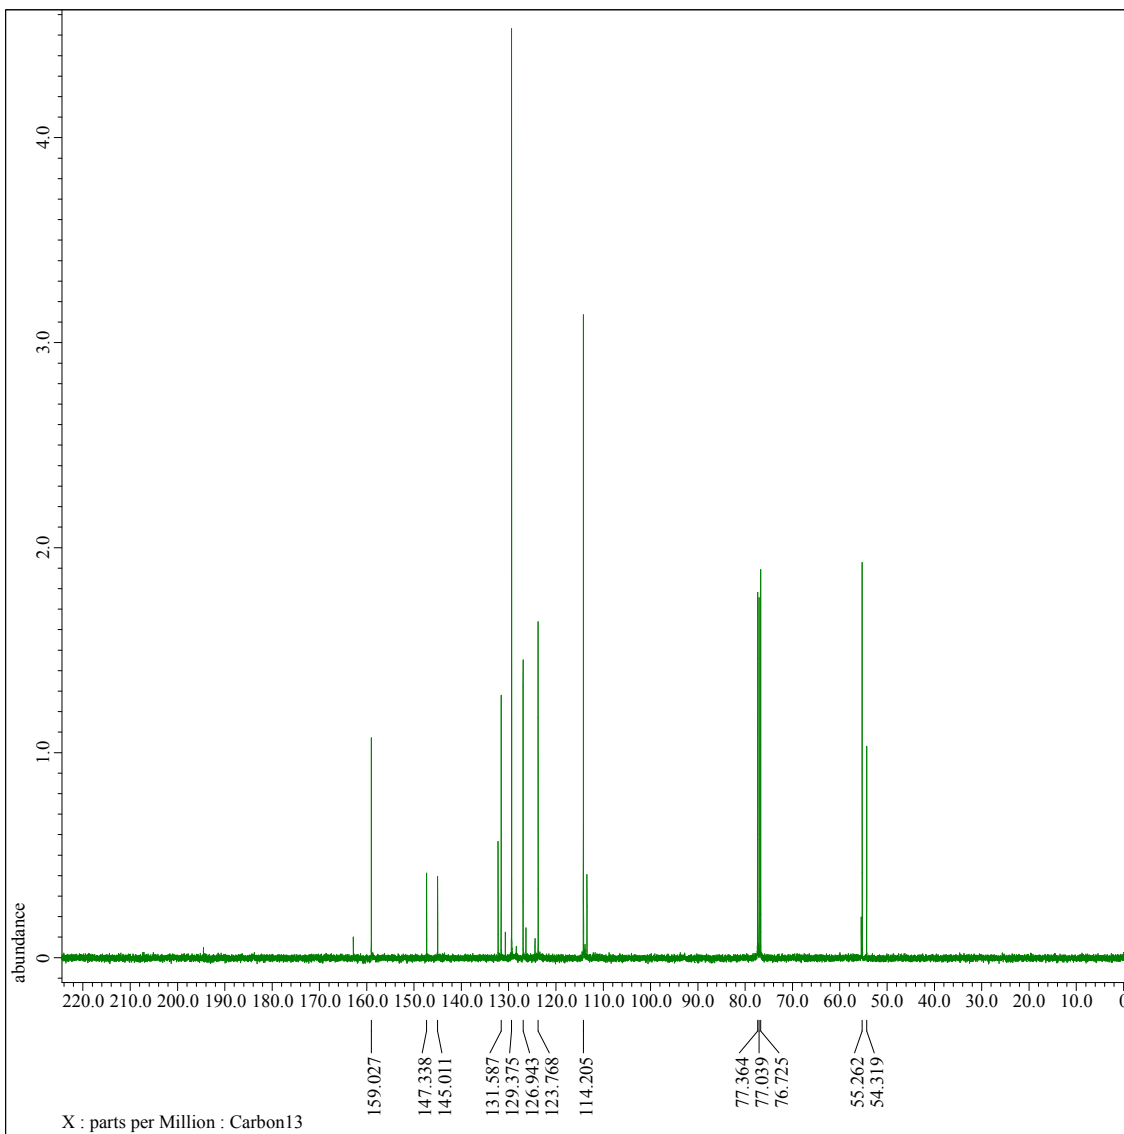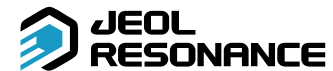

```

Filename      = M-3b-toyo_Carbon-1-4.jdf
Author       = delta
Experiment   = carbon.jxp
Sample Id    = M-3b-toyo
Solvent      = CHLOROFORM-D
Creation Time = 15-SEP-2015 13:05:24
Revision Time = 15-SEP-2015 13:31:19
Current Time  = 15-SEP-2015 13:32:55

Comment      = single pulse decoupled gat
Data Format   = 1D COMPLEX
Dim Size     = 26214
Dim Title    = Carbon13
Dim Units    = [ppm]
Dimensions   = X
Site         = JNM-ECS400
Spectrometer = DELTA2_NMR

Field Strength = 9.389766[T] (400[MHz])
X Acq Duration = 1.04333312[s]
X Domain       = 13C
X Freq        = 100.52530333[MHz]
X Offset      = 100[ppm]
X Points      = 32768
X Prescans    = 4
X Resolution  = 0.95846665[Hz]
X Sweep       = 31.40703518[kHz]
X Sweep Clipped = 25.12562814[kHz]
Irr Domain    = Proton
Irr Freq      = 399.78219838[MHz]
Irr Offset    = 5[ppm]
Clipped       = FALSE
Scans         = 331
Total Scans   = 331

Relaxation Delay = 2[s]
Recvr Gain      = 60
Temp Get        = 20.8[dC]
X 90 Width     = 7.63[us]
X Acq Time     = 1.04333312[s]
X Angle        = 30[deg]
X Atn          = 3.3[dB]
X Pulse        = 2.54333333[us]
Irr Atn Dec    = 21.538[dB]
Irr Atn Noe    = 21.538[dB]
Irr Noise      = WALTZ
Irr Pwidth     = 0.115[ms]
Decoupling     = TRUE
Initial Wait   = 1[s]
Noe            = TRUE
Noe Time       = 2[s]
Repetition Time = 3.04333312[s]
  
```

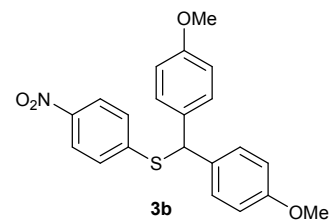



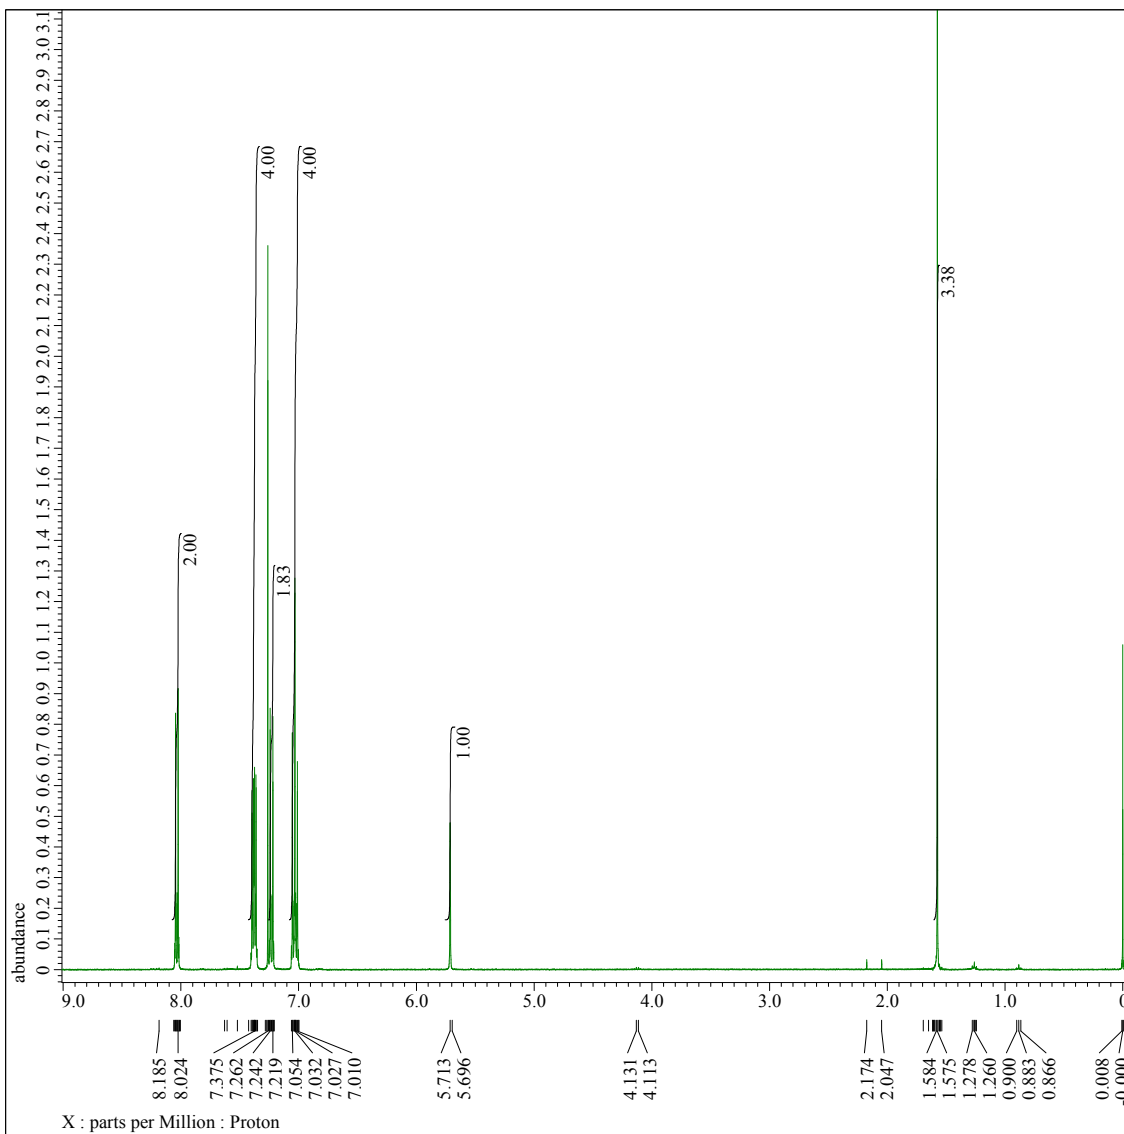

Filename = mto083\_Proton-2-3.jdf  
 Author = delta  
 Experiment = proton.jxp  
 Sample Id = mto083  
 Solvent = CHLOROFORM-D  
 Creation Time = 2-JUL-2014 20:19:58  
 Revision Time = 3-JUL-2014 10:16:21  
 Current Time = 7-JUL-2015 14:08:12

Comment = single\_pulse  
 Data Format = 1D COMPLEX  
 Dim Size = 52429  
 Dim Title = Proton  
 Dim Units = [ppm]  
 Dimensions = X  
 Site = JNM-ECS400  
 Spectrometer = DELTA2\_NMR

Field Strength = 9.389766[T] (400[MHz])  
 X Acq Duration = 8.73463808[s]  
 X Domain = 1H  
 X Freq = 399.78219838[MHz]  
 X Offset = 5[ppm]  
 X Points = 65536  
 X Prescans = 1  
 X Resolution = 0.11448671[Hz]  
 X Sweep = 7.5030012[kHz]  
 X Sweep Clipped = 6.00240096[kHz]  
 Irr Domain = Proton  
 Irr Freq = 399.78219838[MHz]  
 Irr Offset = 5[ppm]  
 Tri Domain = Proton  
 Tri Freq = 399.78219838[MHz]  
 Tri Offset = 5[ppm]  
 Clipped = FALSE  
 Scans = 8  
 Total Scans = 8

Relaxation Delay = 5[s]  
 Recvr Gain = 46  
 Temp Get = 21.1[dC]  
 X 90 Width = 9.72[us]  
 X Acq Time = 8.73463808[s]  
 X Angle = 45[deg]  
 X Atn = 0.4[db]  
 X Pulse = 4.86[us]  
 Irr Mode = Off  
 Tri Mode = Off  
 Dante Presat = FALSE  
 Initial Wait = 1[s]  
 Repetition Time = 13.73463808[s]

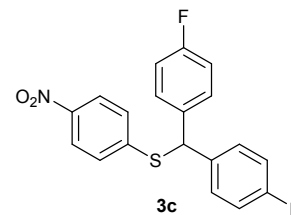

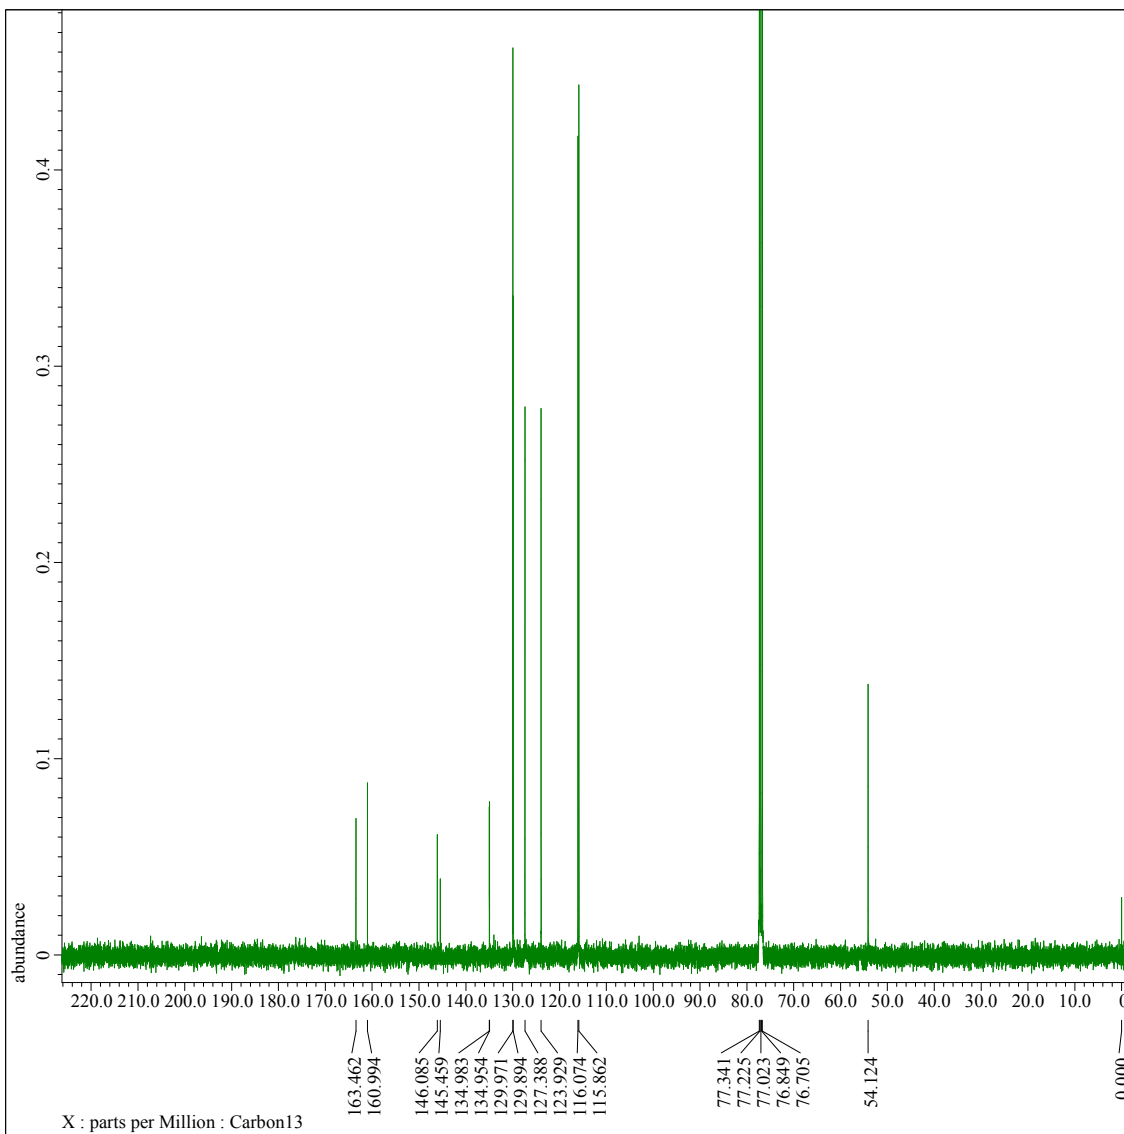

```

Filename      = mto083_Carbon-1-3.jdf
Author       = delta
Experiment   = carbon.jxp
Sample Id    = mto083
Solvent      = CHLOROFORM-D
Creation Time = 2-JUN-2015 19:31:23
Revision Time = 7-JUL-2015 14:25:36
Current Time  = 7-JUL-2015 14:25:39

Comment      = single pulse decoupled gat
Data Format   = 1D COMPLEX
Dim Size     = 26214
Dim Title    = Carbon13
Dim Units    = [ppm]
Dimensions   = X
Site         = JNM-ECS400
Spectrometer = DELTA2_NMR

Field Strength = 9.389766[T] (400[MHz])
X Acq Duration = 1.032192[s]
X Domain       = 13C
X Freq         = 100.52530333[MHz]
X Offset       = 100[ppm]
X Points      = 32768
X Prescans    = 4
X Resolution   = 0.968812[Hz]
X Sweep       = 31.74603175[kHz]
X Sweep Clipped = 25.3968254[kHz]
Irr Domain    = Proton
Irr Freq      = 399.78219838[MHz]
Irr Offset    = 5[ppm]
Clipped       = FALSE
Scans         = 1024
Total Scans   = 1024

Relaxation Delay = 2[s]
Recvr Gain       = 56
Temp Get         = 20.6[dC]
X 90 Width      = 8.28[us]
X Acq Time      = 1.032192[s]
X Angle         = 30[deg]
X Atn           = 4.1[dB]
X Pulse         = 2.76[us]
Irr Atn Dec     = 21.86[dB]
Irr Atn Noe     = 21.86[dB]
Irr Noise       = WALTZ
Irr Pwidth      = 0.115[ms]
Decoupling      = TRUE
Initial Wait    = 1[s]
Noe              = TRUE
Noe Time        = 2[s]
Repetition Time = 3.032192[s]
  
```

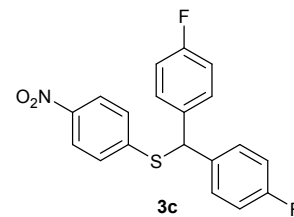

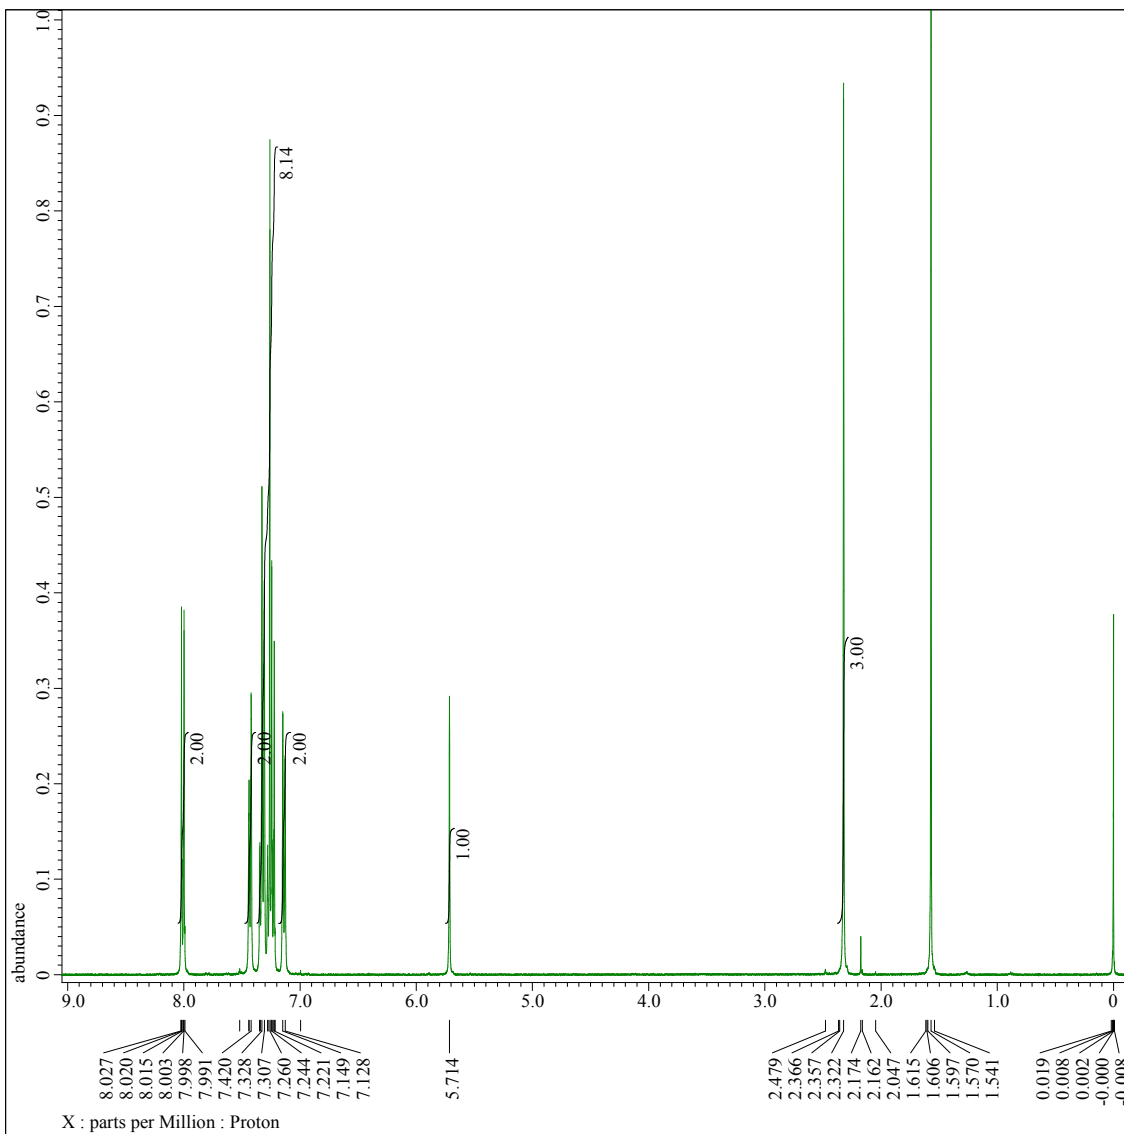

Filename = mto081\_Proton-2-7.jdf  
 Author = delta  
 Experiment = proton.jxp  
 Sample Id = mto081  
 Solvent = CHLOROFORM-D  
 Creation Time = 27-JUN-2014 20:21:59  
 Revision Time = 7-JUL-2015 14:09:51  
 Current Time = 7-JUL-2015 14:10:05

Comment = single pulse  
 Data Format = 1D COMPLEX  
 Dim Size = 52429  
 Dim Title = Proton  
 Dim Units = [ppm]  
 Dimensions = X  
 Site = JNM-ECS400  
 Spectrometer = DELTA2\_NMR

Field Strength = 9.389766[T] (400[MHz])  
 X Acq Duration = 8.73463808[s]  
 X Domain = 1H  
 X Freq = 399.78219838[MHz]  
 X Offset = 5[ppm]  
 X Points = 65536  
 X Prescans = 1  
 X Resolution = 0.11448671[Hz]  
 X Sweep = 7.5030012[kHz]  
 X Sweep Clipped = 6.00240096[kHz]  
 Irr Domain = Proton  
 Irr Freq = 399.78219838[MHz]  
 Irr Offset = 5[ppm]  
 Tri Domain = Proton  
 Tri Freq = 399.78219838[MHz]  
 Tri Offset = 5[ppm]  
 Clipped = FALSE  
 Scans = 8  
 Total Scans = 8

Relaxation Delay = 5[s]  
 Recvr Gain = 44  
 Temp Get = 20.2[dC]  
 X 90 Width = 9.72[us]  
 X Acq Time = 8.73463808[s]  
 X Angle = 45[deg]  
 X Atn = 0.4[db]  
 X Pulse = 4.86[us]  
 Irr Mode = Off  
 Tri Mode = Off  
 Dante Presat = FALSE  
 Initial Wait = 1[s]  
 Repetition Time = 13.73463808[s]

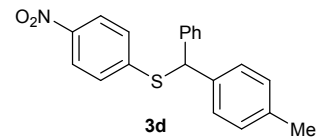

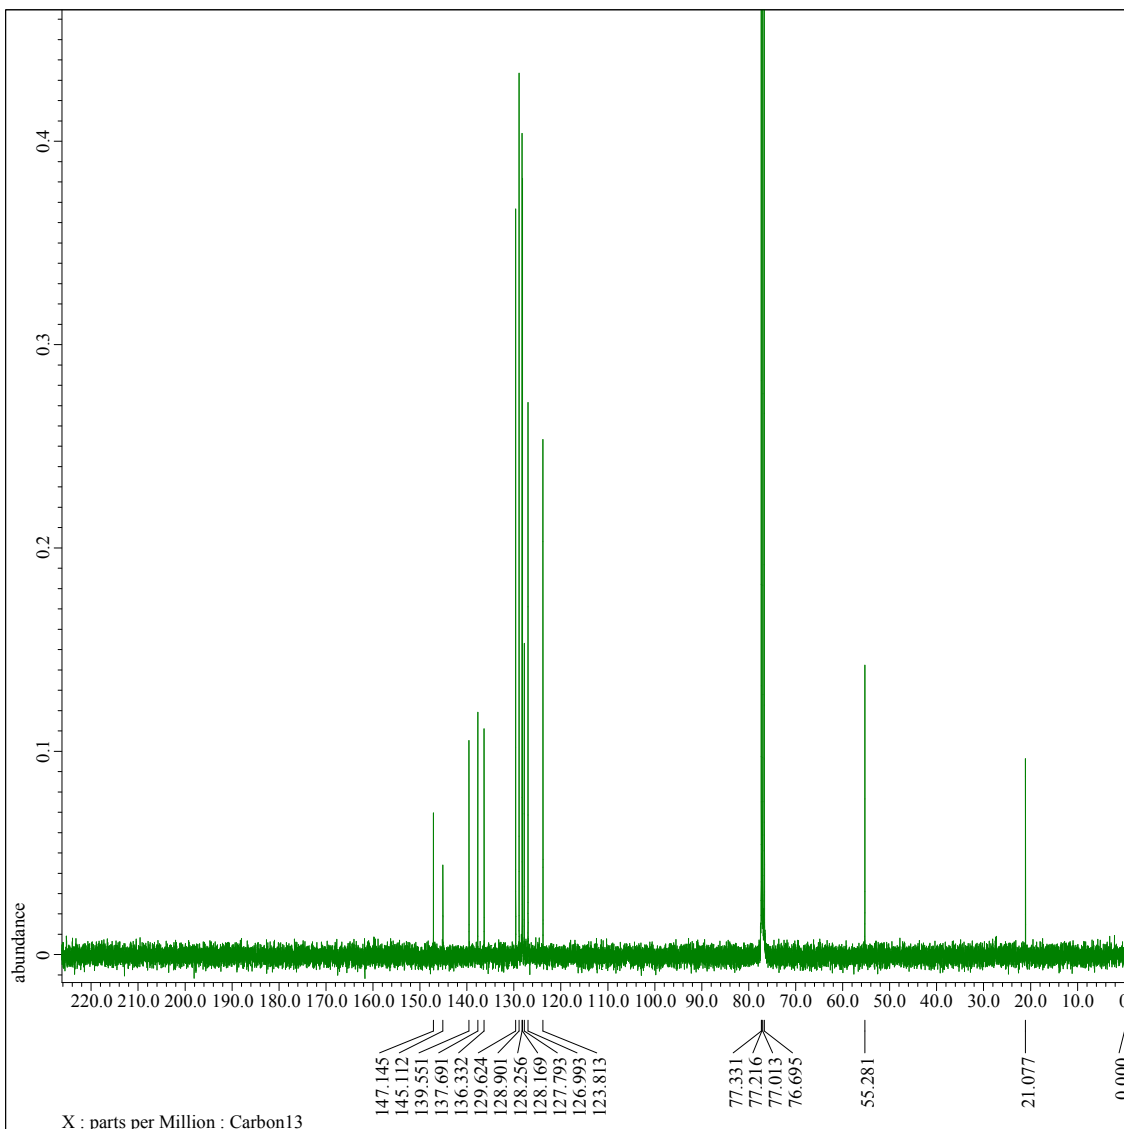

```

Filename      = mto081_Carbon-1-3.jdf
Author       = delta
Experiment   = carbon.jxp
Sample Id    = mto081
Solvent      = CHLOROFORM-D
Creation_Time = 2-JUN-2015 21:39:39
Revision_Time = 7-JUL-2015 14:26:24
Current_Time  = 7-JUL-2015 14:26:28

Comment      = single pulse decoupled gat
Data Format   = 1D COMPLEX
Dim Size     = 26214
Dim Title    = Carbon13
Dim Units    = [ppm]
Dimensions   = X
Site         = JNM-ECS400
Spectrometer = DELTA2_NMR

Field Strength = 9.389766[T] (400[MHz])
X Acq_Duration = 1.032192[s]
X Domain       = 13C
X Freq         = 100.52530333[MHz]
X Offset       = 100[ppm]
X Points      = 32768
X Prescans    = 4
X Resolution   = 0.968812[Hz]
X Sweep       = 31.74603175[kHz]
X Sweep_Clipped = 25.3968254[kHz]
Irr_Domain    = Proton
Irr_Freq      = 399.78219838[MHz]
Irr_Offset    = 5[ppm]
Clipped       = FALSE
Scans         = 1024
Total_Scans   = 1024

Relaxation_Delay = 2[s]
Recvr_Gain       = 56
Temp_Get         = 20.7[dC]
X_90_Width      = 8.28[us]
X_Acq_Time      = 1.032192[s]
X_Angle         = 30[deg]
X_Atn           = 4.1[dB]
X_Pulse         = 2.76[us]
Irr_Atn_Dec     = 21.86[dB]
Irr_Atn_No     = 21.86[dB]
Irr_Noise       = WALTZ
Irr_Pwidth      = 0.115[ms]
Decoupling      = TRUE
Initial_Wait    = 1[s]
Noe              = TRUE
Noe_Time        = 2[s]
Repetition_Time = 3.032192[s]
  
```

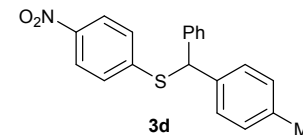

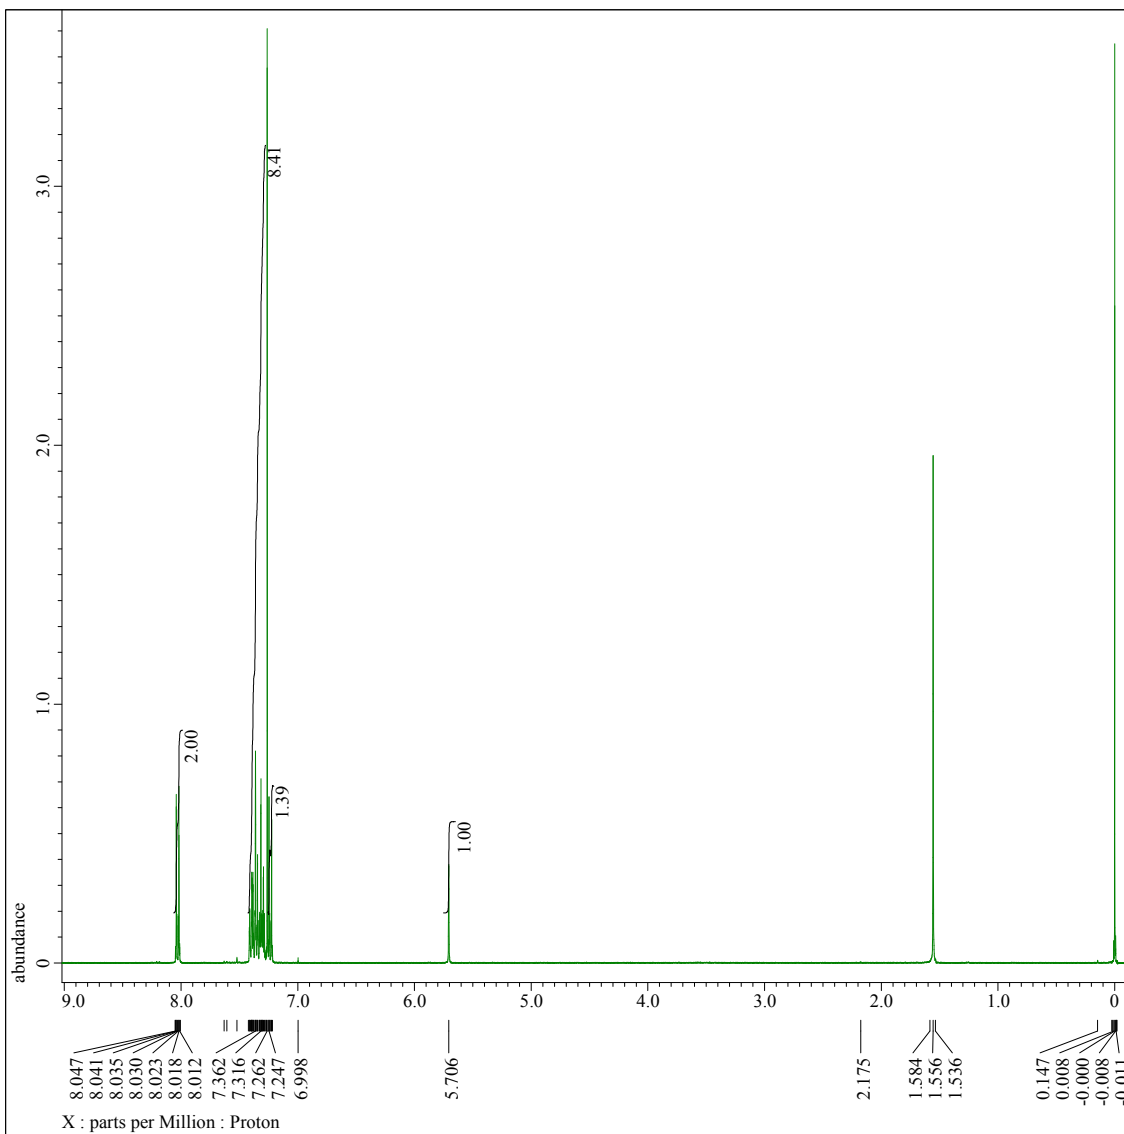

Filename = mt0110\_Proton-4-3.jdf  
 Author = delta  
 Experiment = proton.jxp  
 Sample Id = mt0110  
 Solvent = CHLOROFORM-D  
 Creation Time = 28-AUG-2014 18:06:33  
 Revision Time = 28-AUG-2014 18:10:50  
 Current Time = 7-JUL-2015 14:12:03

Comment = single\_pulse  
 Data Format = 1D\_COMPLEX  
 Dim Size = 52429  
 Dim Title = Proton  
 Dim Units = [ppm]  
 Dimensions = X  
 Site = JNM-ECS400  
 Spectrometer = DELTA2\_NMR

Field Strength = 9.389766[T] (400[MHz])  
 X Acq Duration = 8.73463808[s]  
 X Domain = 1H  
 X Freq = 399.78219838[MHz]  
 X Offset = 5[ppm]  
 X Points = 65536  
 X Prescans = 1  
 X Resolution = 0.11448671[Hz]  
 X Sweep = 7.5030012[kHz]  
 X Sweep Clipped = 6.00240096[kHz]  
 Irr Domain = Proton  
 Irr Freq = 399.78219838[MHz]  
 Irr Offset = 5[ppm]  
 Tri Domain = Proton  
 Tri Freq = 399.78219838[MHz]  
 Tri Offset = 5[ppm]  
 Clipped = FALSE  
 Scans = 8  
 Total Scans = 8

Relaxation Delay = 5[s]  
 Recvr Gain = 50  
 Temp Get = 19.9[dC]  
 X 90 Width = 9.72[us]  
 X Acq Time = 8.73463808[s]  
 X Angle = 45[deg]  
 X Atn = 0.4[dB]  
 X Pulse = 4.86[us]  
 Irr Mode = Off  
 Tri Mode = Off  
 Dante Presat = FALSE  
 Initial Wait = 1[s]  
 Repetition Time = 13.73463808[s]

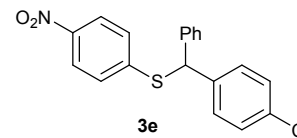

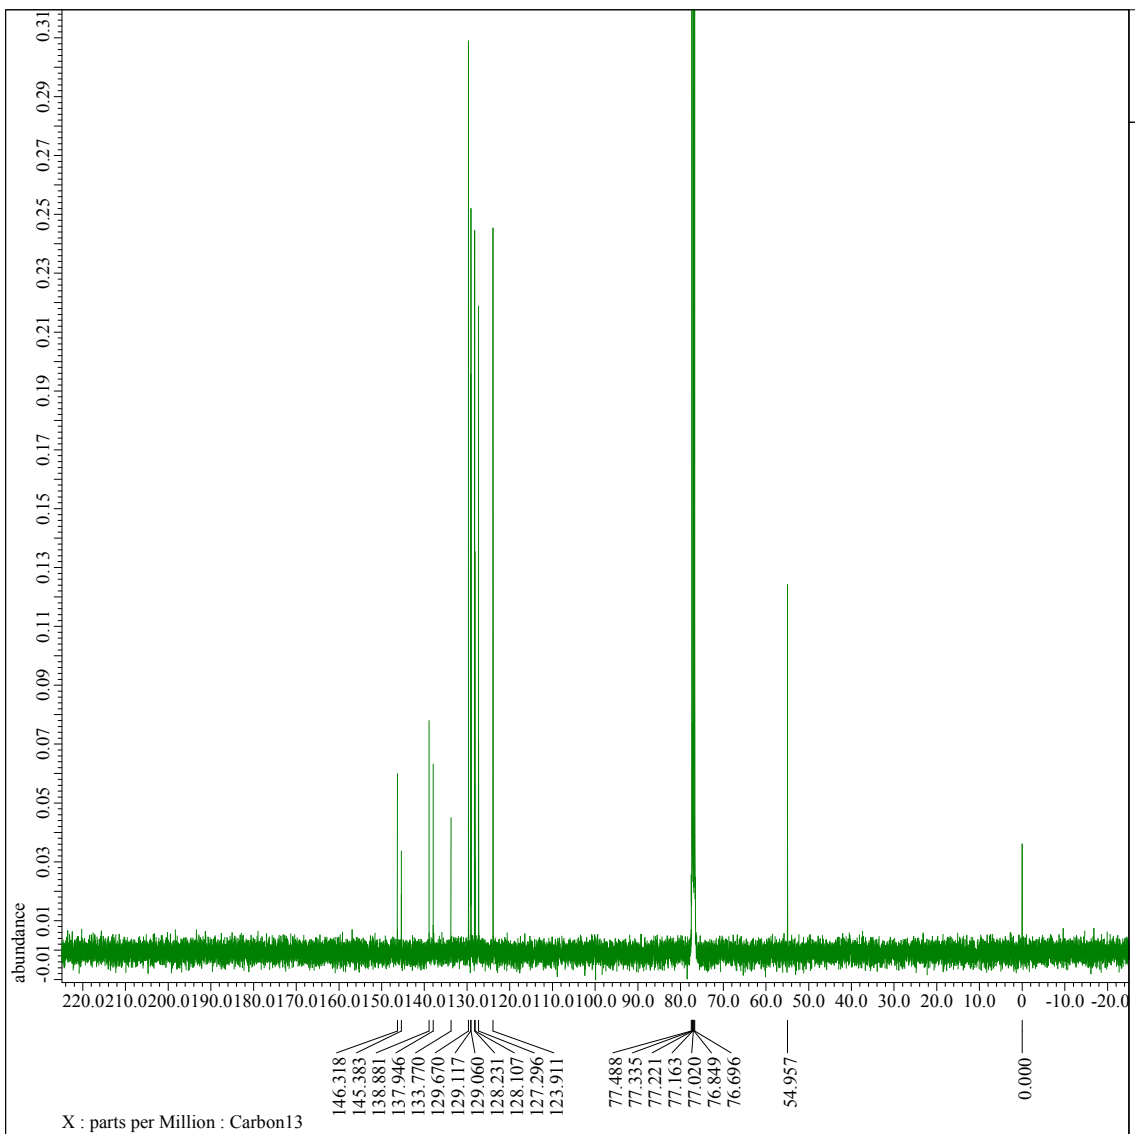

```

Filename      = mto110_Carbon-1-3.jdf
Author       = delta
Experiment   = carbon.jxp
Sample Id    = mto110
Solvent      = CHLOROFORM-D
Creation Time = 14-MAY-2015 22:43:12
Revision Time = 7-JUL-2015 14:27:14
Current Time  = 7-JUL-2015 14:27:30

Comment      = single pulse decoupled gat
Data Format   = 1D COMPLEX
Dim Size     = 26214
Dim Title    = Carbon13
Dim Units    = [ppm]
Dimensions   = X
Site         = JNM-ECS400
Spectrometer = DELTA2_NMR

Field Strength = 9.389766[T] (400[MHz])
X Acq Duration = 1.04333312[s]
X Domain      = 13C
X Freq        = 100.52530333[MHz]
X Offset      = 100[ppm]
X Points      = 32768
X Fscans      = 4
X Resolution  = 0.95846665[Hz]
X Sweep       = 31.40703518[kHz]
X Sweep Clipped = 25.12562814[kHz]
Irr Domain    = Proton
Irr Freq      = 399.78219838[MHz]
Irr Offset    = 5[ppm]
Clipped       = FALSE
Scans         = 4000
Total Scans   = 4000

Relaxation Delay = 2[s]
Recvr Gain      = 60
Temp Get       = 20.9[dC]
X 90 Width     = 8.28[us]
X Acq Time     = 1.04333312[s]
X Angle        = 30[deg]
X Atn          = 4.1[dB]
X Pulse        = 2.76[us]
Irr Atn Dec    = 21.86[dB]
Irr Atn Noe    = 21.86[dB]
Irr Noise      = WALTZ
Irr Pwidth     = 0.115[ms]
Decoupling     = TRUE
Initial Wait   = 1[s]
Noe            = TRUE
Noe Time       = 2[s]
Repetition Time = 3.04333312[s]
  
```

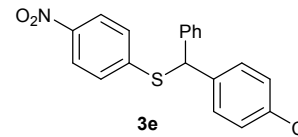

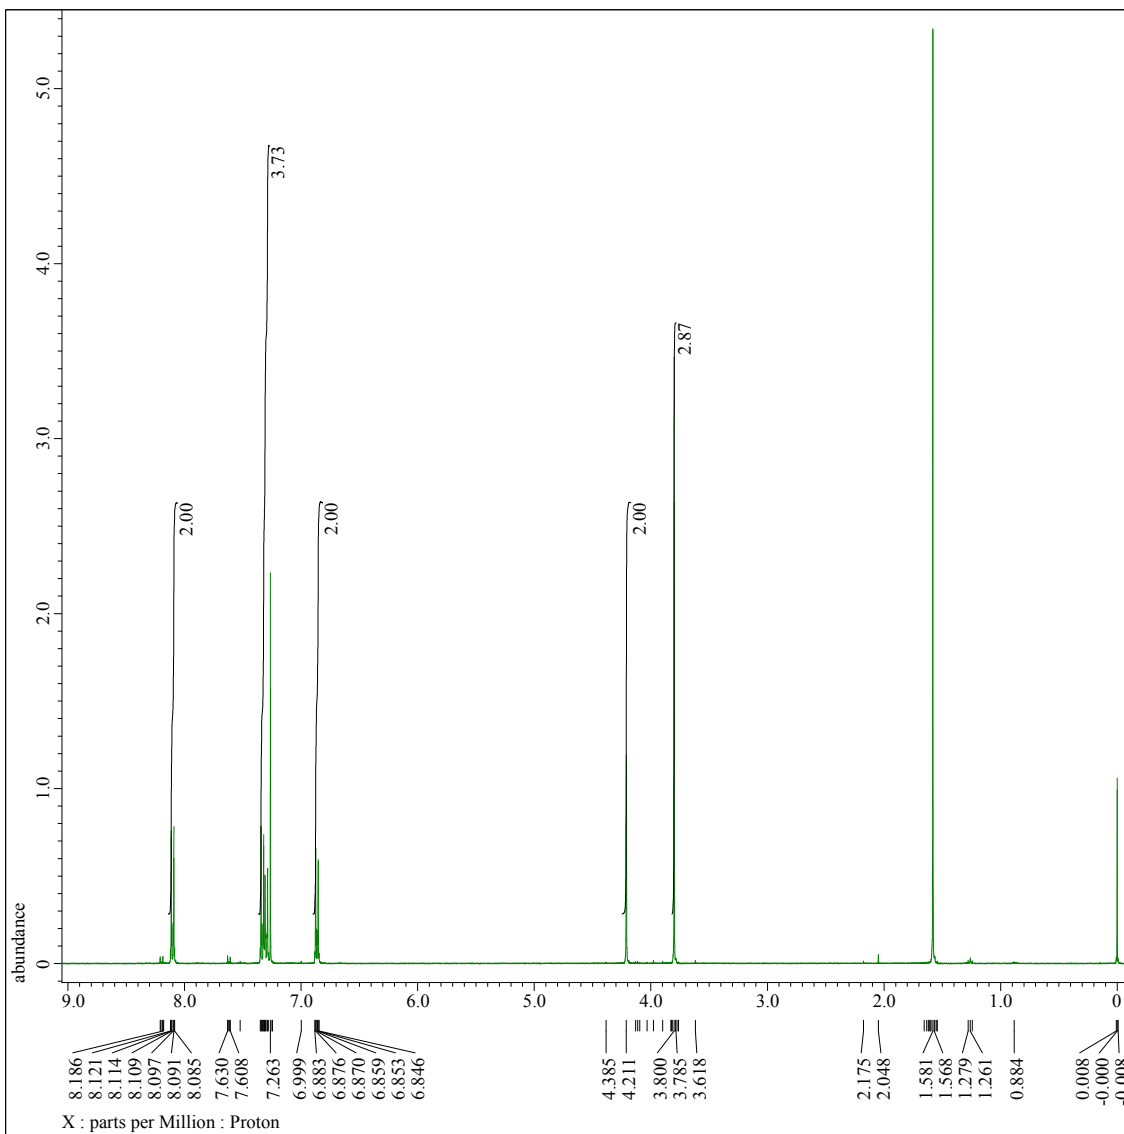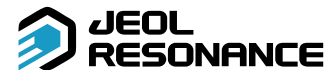

```

Filename      = mto107 16^30_Proton-1-6.jd
Author       = delta
Experiment   = proton.jxp
Sample Id    = mto107 16^30
Solvent      = CHLOROFORM-D
Creation Time = 15-AUG-2014 15:37:09
Revision Time = 4-JUN-2015 10:56:52
Current Time  = 7-JUL-2015 14:12:59

Comment      = single_pulse
Data Format   = 1D_COMPLEX
Dim Size     = 52429
Dim Title    = Proton
Dim Units    = [ppm]
Dimensions   = X
Site         = JNM-ECS400
Spectrometer = DELTA2_NMR

Field Strength = 9.389766[T] (400[MHz])
X_Acq_Duration = 8.73463808[s]
X_Domain       = 1H
X_Freq         = 399.78219838[MHz]
X_Offset       = 5[ppm]
X_Points      = 65536
X_Frescos     = 1
X_Resolution   = 0.11448671[Hz]
X_Sweep       = 7.5030012[kHz]
X_Sweep_Clipped = 6.00240096[kHz]
Irr_Domain    = Proton
Irr_Freq      = 399.78219838[MHz]
Irr_Offset    = 5[ppm]
Tri_Domain    = Proton
Tri_Freq      = 399.78219838[MHz]
Tri_Offset    = 5[ppm]
Clipped       = FALSE
Scans         = 8
Total_Scans   = 8

Relaxation_Delay = 5[s]
Recvr Gain       = 48
Temp_Get         = 20.4[dC]
X_90_Width      = 9.72[us]
X_Acq_Time      = 8.73463808[s]
X_Angle         = 45[deg]
X_Atn           = 0.4[dB]
X_Pulse         = 4.86[us]
Irr_Mode        = Off
Tri_Mode        = Off
Dante_Presat    = FALSE
Initial_Wait    = 1[s]
Repetition_Time = 13.73463808[s]
  
```

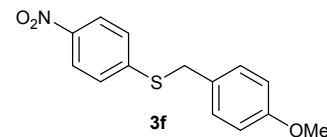

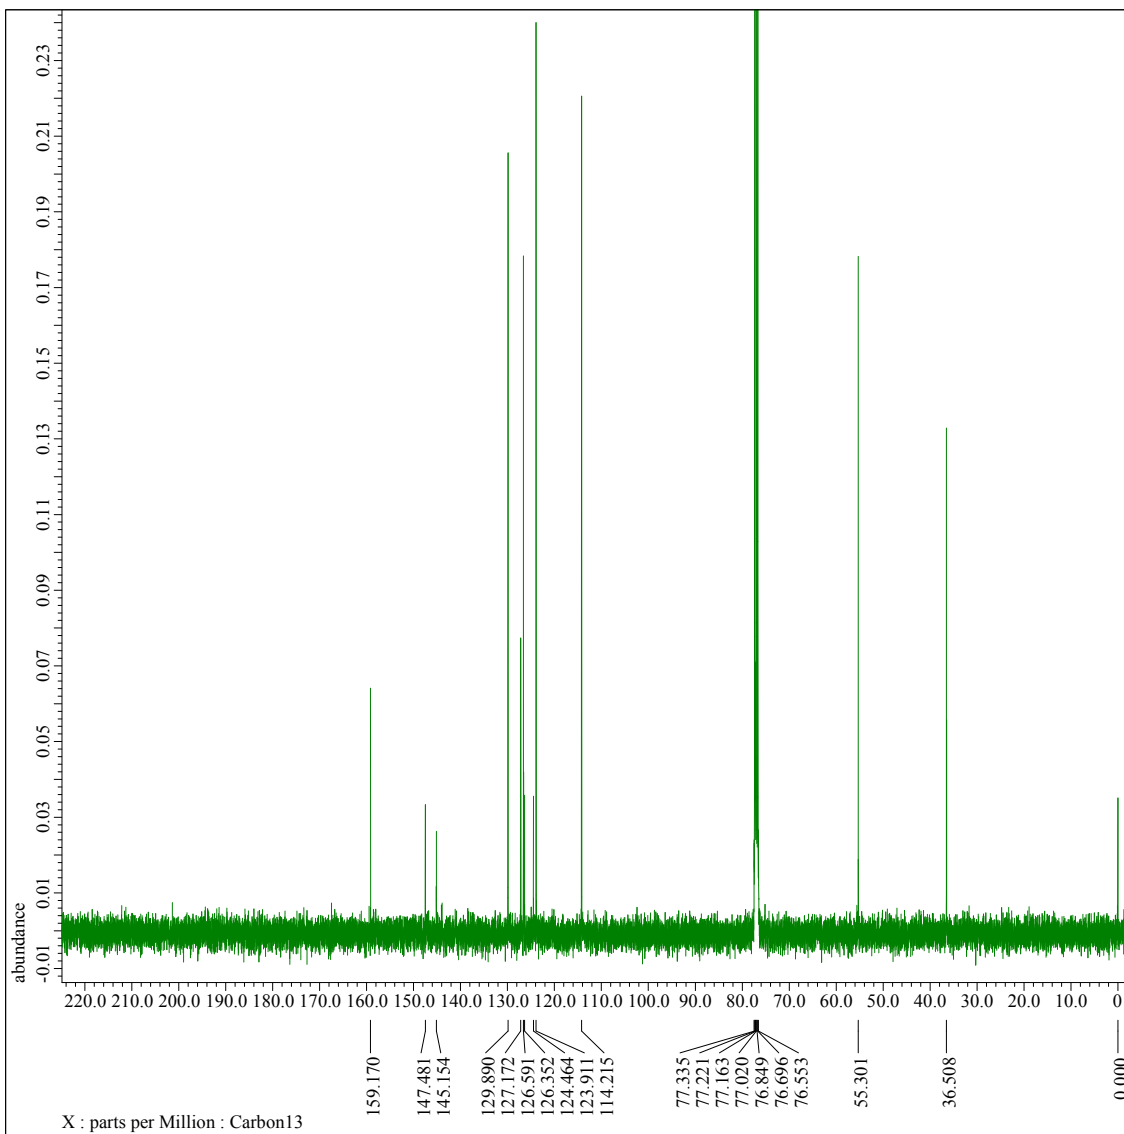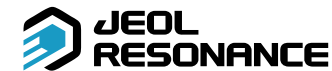

```

Filename      = mto107_Carbon-1-3.jdf
Author        = delta
Experiment    = carbon.jxp
Sample Id     = mto107
Solvent       = CHLOROFORM-D
Creation Time  = 15-MAY-2015 02:16:11
Revision Time  = 7-JUL-2015 14:30:26
Current Time   = 7-JUL-2015 14:30:41

Comment       = single pulse decoupled gat
Data Format    = 1D COMPLEX
Dim Size      = 26214
Dim Title     = Carbon13
Dim Units     = [ppm]
Dimensions    = X
Site          = JNM-ECS400
Spectrometer  = DELTA2_NMR

Field Strength = 9.389766[T] (400[MHz])
X Acq Duration = 1.04333312[s]
X Domain      = 13C
X Freq        = 100.52530333[MHz]
X Offset      = 100[ppm]
X Points      = 32768
X Freqs cans  = 4
X Resolution  = 0.95846665[Hz]
X Sweep       = 31.40703518[kHz]
X Sweep Clipped = 25.12562814[kHz]
Irr Domain    = Proton
Irr Freq      = 399.78219838[MHz]
Irr Offset    = 5[ppm]
Clipped       = FALSE
Scans         = 4000
Total Scans   = 4000

Relaxation Delay = 2[s]
Recvr Gain      = 60
Temp Get       = 20.6[dC]
X 90 Width     = 8.28[us]
X Acq Time     = 1.04333312[s]
X Angle        = 30[deg]
X Atn          = 4.1[dB]
X Pulse        = 2.76[us]
Irr Atn Dec    = 21.86[dB]
Irr Atn Noe    = 21.86[dB]
Irr Noise      = WALTZ
Irr Pwidth     = 0.115[ms]
Decoupling     = TRUE
Initial Wait   = 1[s]
Noe            = TRUE
Noe Time       = 2[s]
Repetition Time = 3.04333312[s]
  
```

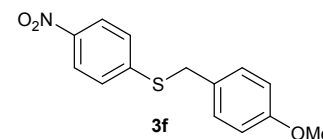



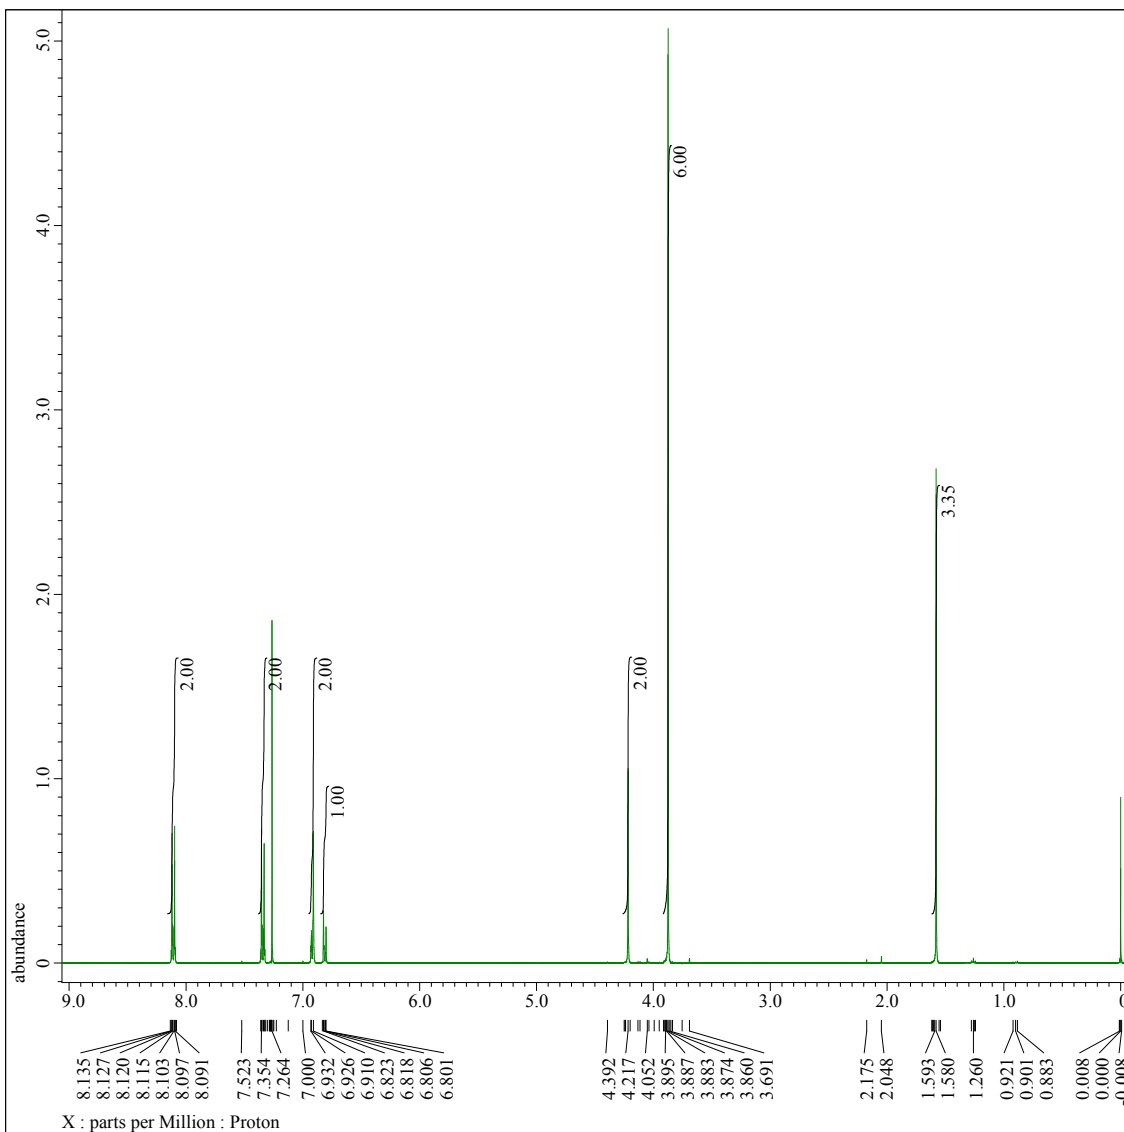

Filename = mto088\_Proton-1-6.jdf  
 Author = delta  
 Experiment = proton.jxp  
 Sample Id = mto088  
 Solvent = CHLOROFORM-D  
 Creation Time = 30-JUN-2014 20:33:19  
 Revision Time = 30-JUN-2014 21:17:56  
 Current Time = 7-JUL-2015 14:13:44

Comment = single\_pulse  
 Data Format = 1D\_COMPLEX  
 Dim Size = 52429  
 Dim Title = Proton  
 Dim Units = [ppm]  
 Dimensions = X  
 Site = JNM-ECS400  
 Spectrometer = DELTA2\_NMR

Field Strength = 9.389766[T] (400[MHz])  
 X Acq Duration = 8.73463808[s]  
 X Domain = 1H  
 X Freq = 399.78219838[MHz]  
 X Offset = 5[ppm]  
 X Points = 65536  
 X Prescans = 1  
 X Resolution = 0.11448671[Hz]  
 X Sweep = 7.5030012[kHz]  
 X Sweep Clipped = 6.00240096[kHz]  
 Irr Domain = Proton  
 Irr Freq = 399.78219838[MHz]  
 Irr Offset = 5[ppm]  
 Tri Domain = Proton  
 Tri Freq = 399.78219838[MHz]  
 Tri Offset = 5[ppm]  
 Clipped = FALSE  
 Scans = 8  
 Total Scans = 8

Relaxation Delay = 5[s]  
 Recvr Gain = 46  
 Temp Get = 20.9[dC]  
 X 90 Width = 9.72[us]  
 X Acq Time = 8.73463808[s]  
 X Angle = 45[deg]  
 X Atn = 0.4[db]  
 X Pulse = 4.86[us]  
 Irr Mode = Off  
 Tri Mode = Off  
 Dante Presat = FALSE  
 Initial Wait = 1[s]  
 Repetition Time = 13.73463808[s]

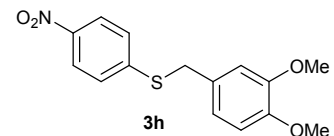

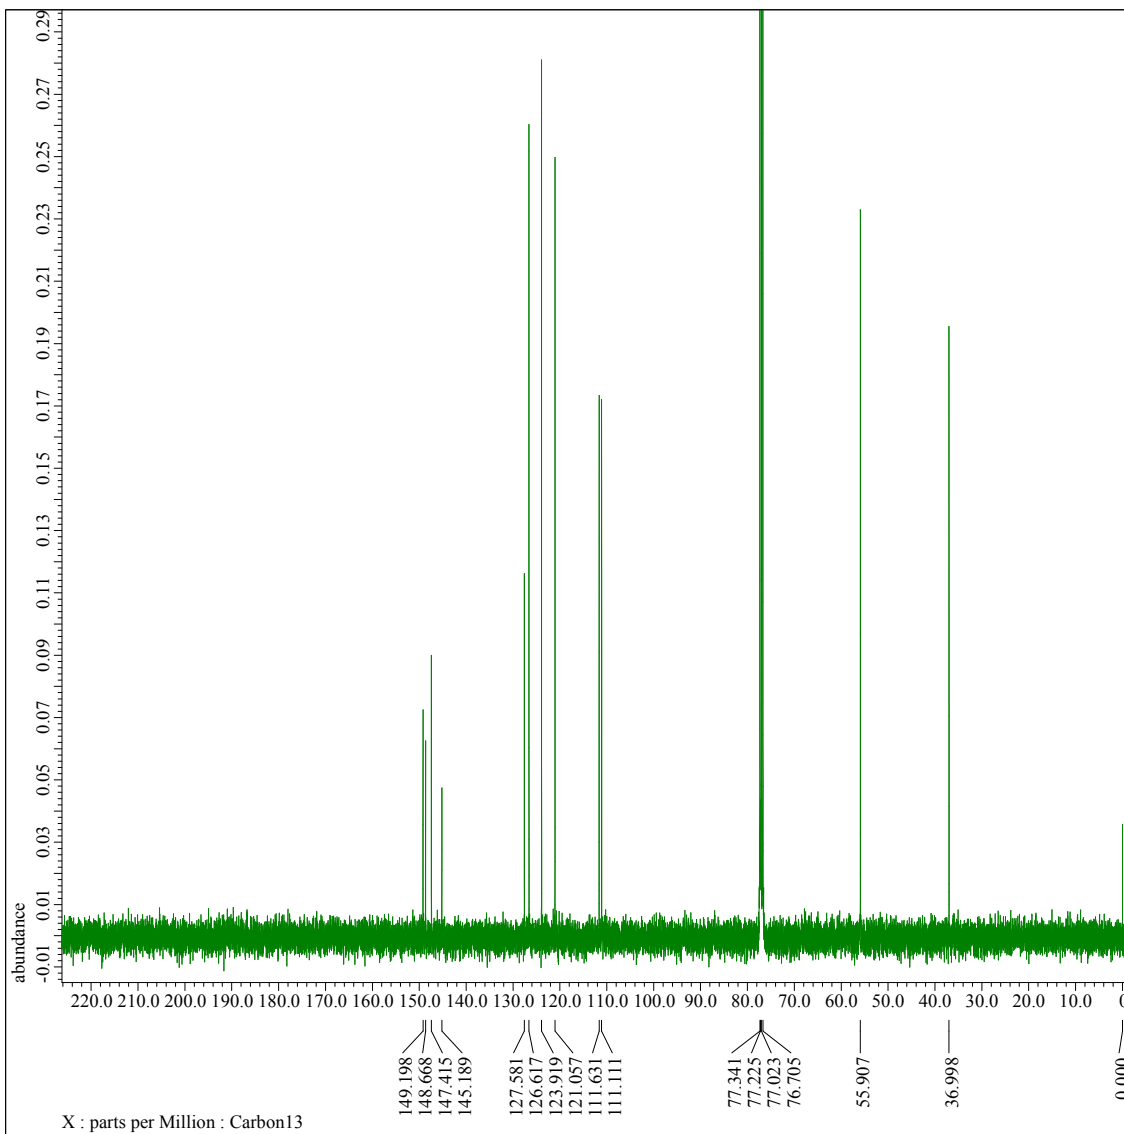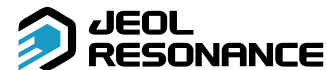

```

Filename      = mto088_Carbon-1-3.jdf
Author       = delta
Experiment   = carbon.jxp
Sample Id    = mto088
Solvent      = CHLOROFORM-D
Creation Time = 2-JUN-2015 20:36:19
Revision Time = 16-JUN-2015 11:02:23
Current Time  = 7-JUL-2015 14:31:26

Comment      = single pulse decoupled gat
Data Format   = 1D COMPLEX
Dim Size     = 26214
Dim Title    = Carbon13
Dim Units    = [ppm]
Dimensions   = X
Site         = JNM-ECS400
Spectrometer = DELTA2_NMR

Field Strength = 9.389766[T] (400[MHz])
X Acq Duration = 1.032192[s]
X Domain      = 13C
X Freq        = 100.52530333[MHz]
X Offset      = 100[ppm]
X Points      = 32768
X Fscans      = 4
X Resolution  = 0.968812[Hz]
X Sweep       = 31.74603175[kHz]
X Sweep Clipped = 25.3968254[kHz]
Irr Domain    = Proton
Irr Freq      = 399.78219838[MHz]
Irr Offset    = 5[ppm]
Clipped       = FALSE
Scans         = 1024
Total Scans   = 1024

Relaxation Delay = 2[s]
Recvr Gain       = 56
Temp Get         = 20.8[dC]
X 90 Width      = 8.28[us]
X Acq Time      = 1.032192[s]
X Angle         = 30[deg]
X Atn           = 4.1[dB]
X Pulse         = 2.76[us]
Irr Atn Dec     = 21.86[dB]
Irr Atn Noe     = 21.86[dB]
Irr Noise       = WALTZ
Irr Pwidth      = 0.115[ms]
Decoupling      = TRUE
Initial Wait    = 1[s]
Noe             = TRUE
Noe Time        = 2[s]
Repetition Time = 3.032192[s]
  
```

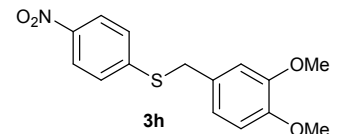

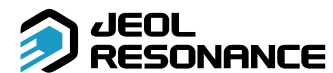

Filename = mto103\_fr2^3\_Proton-1-3.jd  
Author = delta  
Experiment = proton.jxp  
Sample Id = mto103\_fr2^3  
Solvent = CHLOROFORM-D  
Creation Time = 28-JUL-2014 18:10:50  
Revision Time = 28-JUL-2014 19:06:40  
Current Time = 7-JUL-2015 14:15:03

Comment = single\_pulse  
Data Format = 1D\_COMPLEX  
Dim Size = 52429  
Dim Title = Proton  
Dim Units = [ppm]  
Dimensions = X  
Site = JNM-ECS400  
Spectrometer = DELTA2\_NMR

Field Strength = 9.389766[T] (400[MHz])  
X Acq Duration = 8.73463808[s]  
X Domain = 1H  
X Freq = 399.78219838[MHz]  
X Offset = 5[ppm]  
X Points = 65536  
X Prescans = 1  
X Resolution = 0.11448671[Hz]  
X Sweep = 7.5030012[kHz]  
X Sweep Clipped = 6.00240096[kHz]  
Irr Domain = Proton  
Irr Freq = 399.78219838[MHz]  
Irr Offset = 5[ppm]  
Tri Domain = Proton  
Tri Freq = 399.78219838[MHz]  
Tri Offset = 5[ppm]  
Clipped = FALSE  
Scans = 8  
Total Scans = 8

Relaxation Delay = 5[s]  
Recvr Gain = 46  
Temp Get = 20.5[dC]  
X 90 Width = 9.72[us]  
X Acq Time = 8.73463808[s]  
X Angle = 45[deg]  
X Atn = 0.4[dB]  
X Pulse = 4.86[us]  
Irr Mode = Off  
Tri Mode = Off  
Dante Presat = FALSE  
Initial Wait = 1[s]  
Repetition Time = 13.73463808[s]

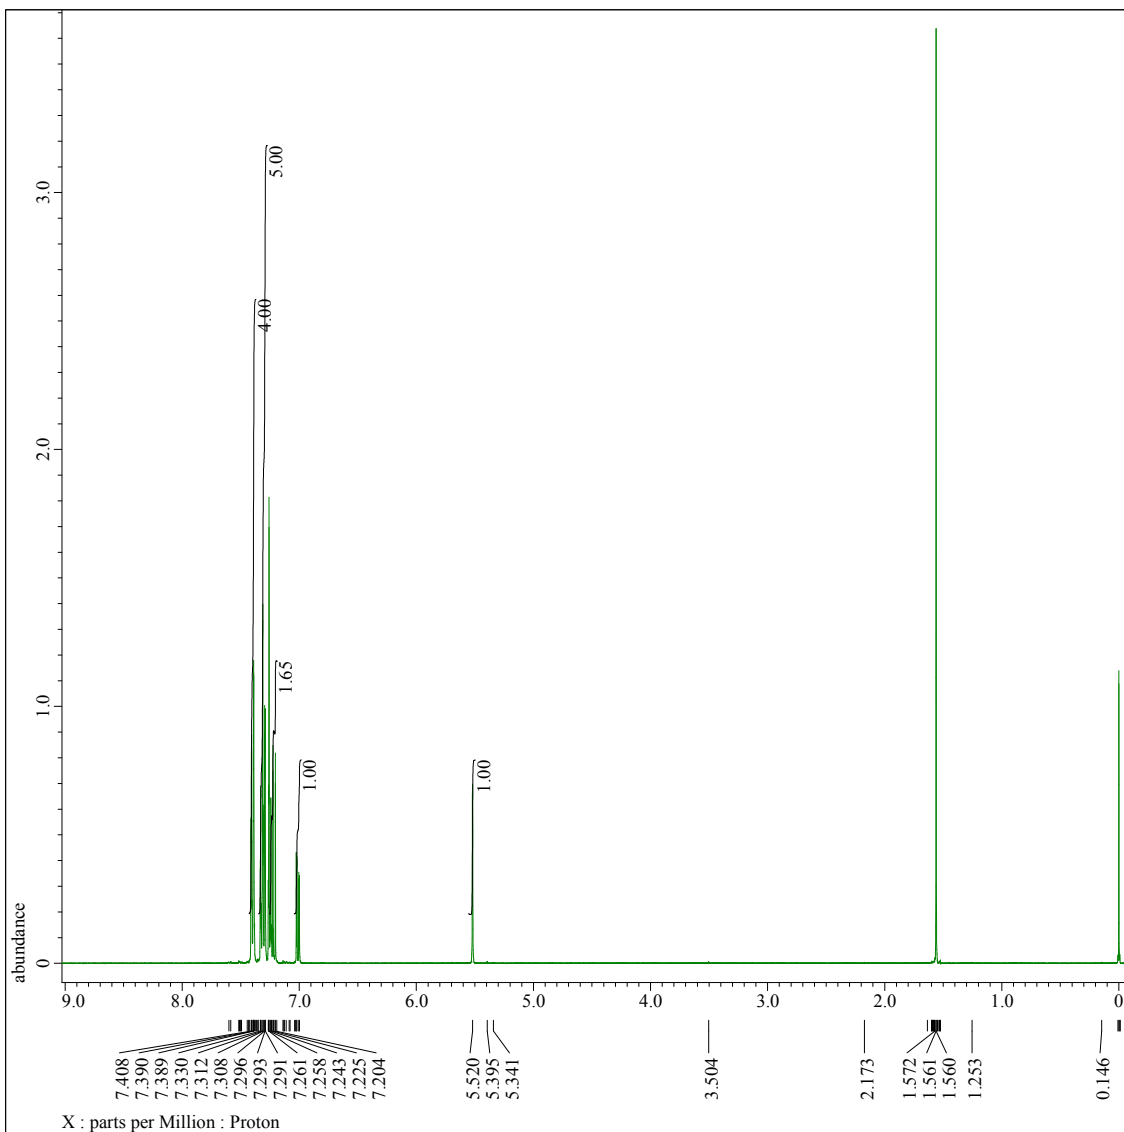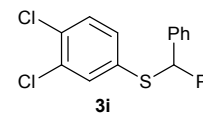

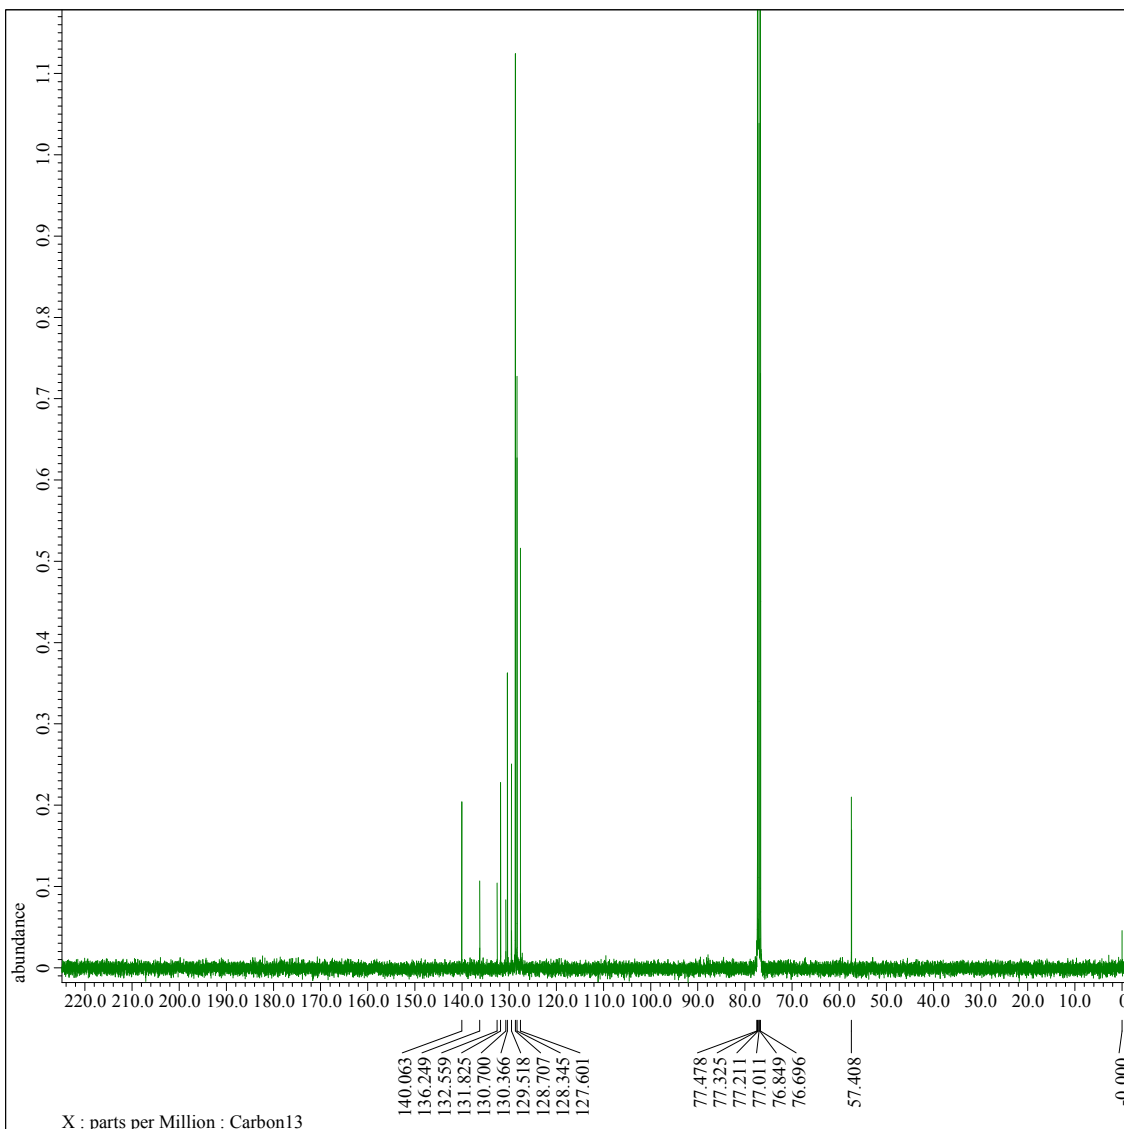

```

Filename      = mto103_Carbon-1-3.jdf
Author       = delta
Experiment   = carbon.jxp
Sample Id    = mto103
Solvent      = CHLOROFORM-D
Creation Time = 9-JUN-2015 19:15:09
Revision Time = 16-JUN-2015 11:31:03
Current Time  = 7-JUL-2015 14:32:06

Comment      = single pulse decoupled gat
Data Format   = 1D COMPLEX
Dim Size     = 26214
Dim Title    = Carbon13
Dim Units    = [ppm]
Dimensions   = X
Site         = JNM-ECS400
Spectrometer = DELTA2_NMR

Field Strength = 9.389766[T] (400[MHz])
X_Acq_Duration = 1.04333312[s]
X_Domain      = 13C
X_Freq       = 100.52530333[MHz]
X_Offset     = 100[ppm]
X_Points     = 32768
X_Frescans   = 4
X_Resolution = 0.95846665[Hz]
X_Sweep      = 31.40703518[kHz]
X_Sweep_Clip = 25.12562814[kHz]
Irr_Domain   = Proton
Irr_Freq     = 399.78219838[MHz]
Irr_Offset   = 5[ppm]
Clipped     = FALSE
Scans       = 1024
Total_Scans = 1024

Relaxation_Delay = 2[s]
Recvr_Gain      = 60
Temp_Get       = 21.2[dC]
X_90_Width     = 8.28[us]
X_Acq_Time     = 1.04333312[s]
X_Angle       = 30[deg]
X_Atn         = 4.1[dB]
X_Pulse       = 2.76[us]
Irr_Atn_Dec   = 21.86[dB]
Irr_Atn_No   = 21.86[dB]
Irr_Noise     = WALTZ
Irr_Pwidth    = 0.115[ms]
Decoupling    = TRUE
Initial_Wait  = 1[s]
Noe           = TRUE
Noe_Time      = 2[s]
Repetition_Time = 3.04333312[s]
  
```

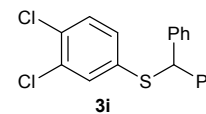

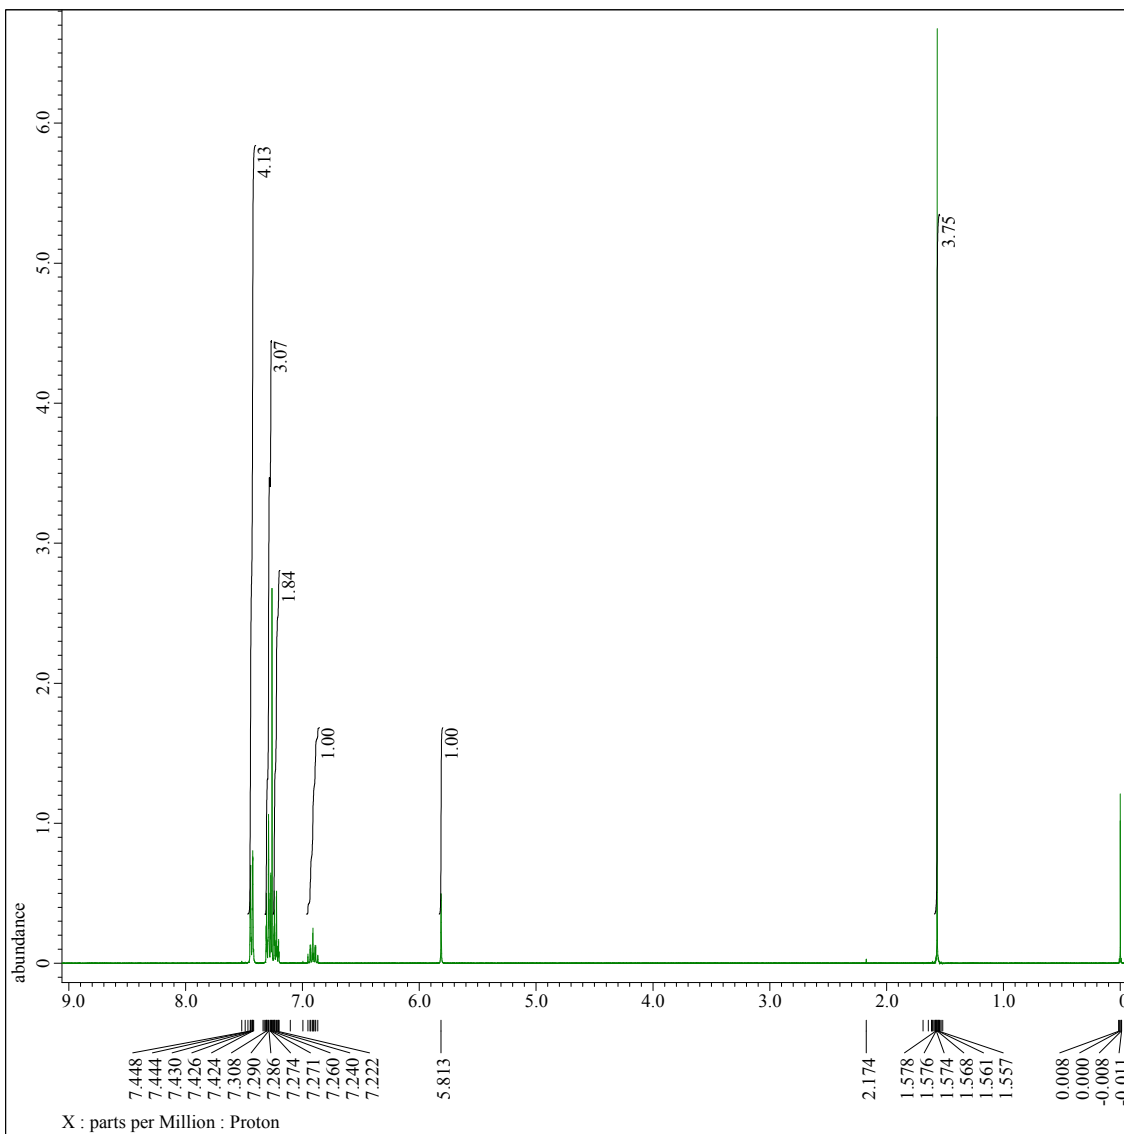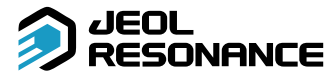

Filename = mto090\_Proton-1-3.jdf  
 Author = delta  
 Experiment = proton.jxp  
 Sample Id = mto090  
 Solvent = CHLOROFORM-D  
 Creation Time = 7-JUL-2014 16:04:55  
 Revision Time = 7-JUL-2014 18:19:36  
 Current Time = 7-JUL-2015 14:17:43

Comment = single\_pulse  
 Data Format = 1D COMPLEX  
 Dim Size = 52429  
 Dim Title = Proton  
 Dim Units = [ppm]  
 Dimensions = X  
 Site = JNM-ECS400  
 Spectrometer = DELTA2\_NMR

Field Strength = 9.389766[T] (400[MHz])  
 X Acq Duration = 8.73463808[s]  
 X Domain = 1H  
 X Freq = 399.78219838[MHz]  
 X Offset = 5[ppm]  
 X Points = 65536  
 X Prescans = 1  
 X Resolution = 0.11448671[Hz]  
 X Sweep = 7.5030012[kHz]  
 X Sweep Clipped = 6.00240096[kHz]  
 Irr Domain = Proton  
 Irr Freq = 399.78219838[MHz]  
 Irr Offset = 5[ppm]  
 Tri Domain = Proton  
 Tri Freq = 399.78219838[MHz]  
 Tri Offset = 5[ppm]  
 Clipped = FALSE  
 Scans = 8  
 Total Scans = 8

Relaxation Delay = 5[s]  
 Recvr Gain = 48  
 Temp Get = 20.4[dC]  
 X 90 Width = 9.72[us]  
 X Acq Time = 8.73463808[s]  
 X Angle = 45[deg]  
 X Atn = 0.4[db]  
 X Pulse = 4.86[us]  
 Irr Mode = Off  
 Tri Mode = Off  
 Dante Presat = FALSE  
 Initial Wait = 1[s]  
 Repetition Time = 13.73463808[s]

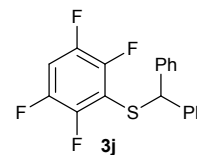

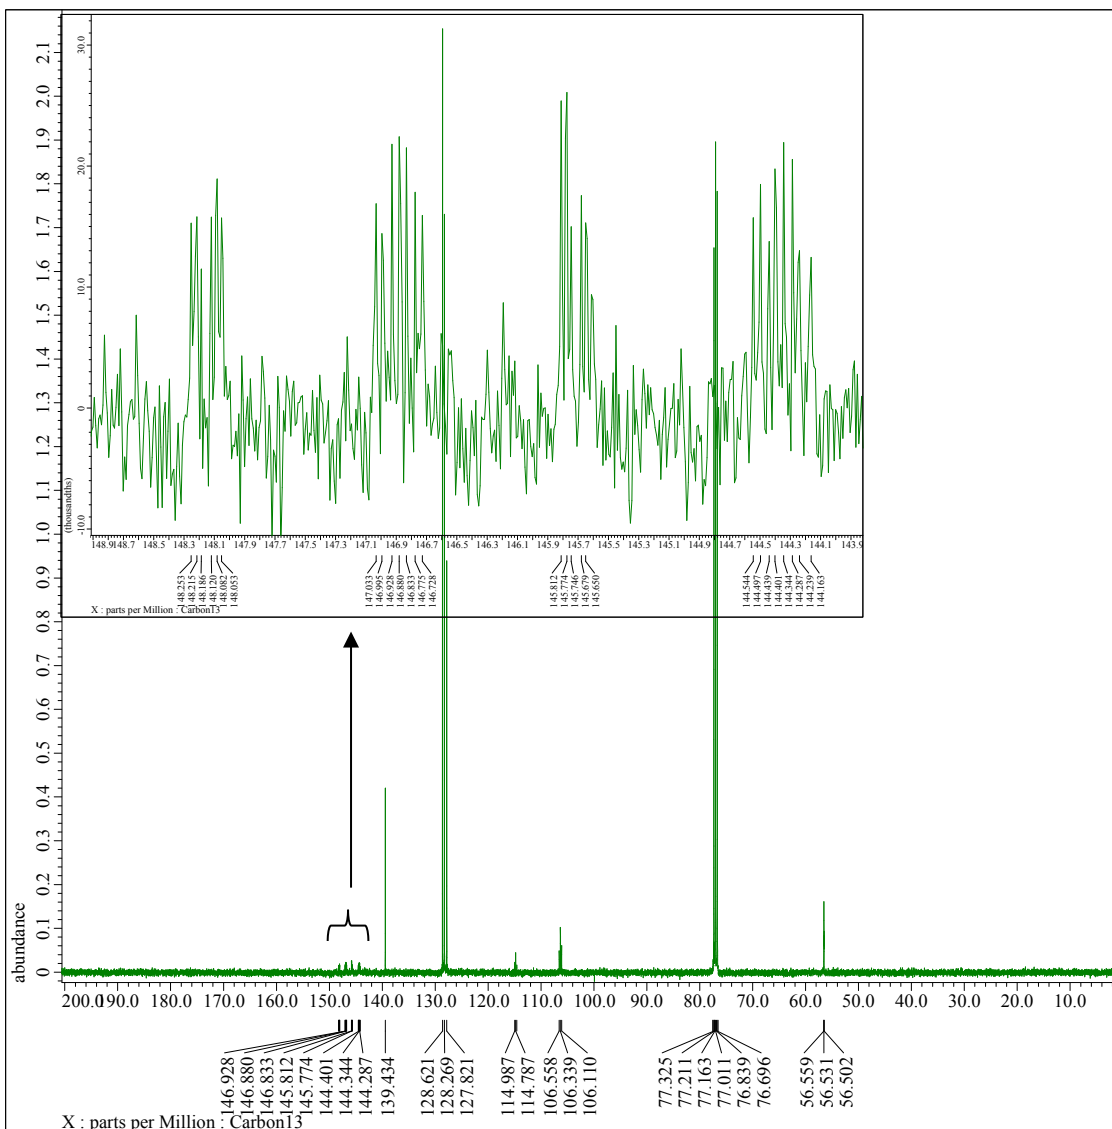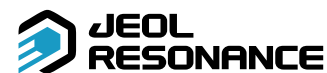

```

Filename      = mto090_Carbon-2-9.jdf
Author       = delta
Experiment   = carbon.jxp
Sample Id    = mto090
Solvent      = CHLOROFORM-D
Creation Time = 23-JUN-2015 20:46:36
Revision Time = 15-SEP-2015 11:14:09
Current Time  = 15-SEP-2015 11:15:36

Comment      = single pulse decoupled gat
Data Format   = 1D COMPLEX
Dim Size     = 26214
Dim Title    = Carbon13
Dim Units    = [ppm]
Dimensions   = X
Site         = JNM-ECS400
Spectrometer = DELTA2_NMR

Field Strength = 9.389766[T] (400[MHz])
X Acq Duration = 1.04333312[s]
X Domain      = 13C
X Freq        = 100.52530333[MHz]
X Offset      = 100[ppm]
X Points      = 32768
X Prescans    = 4
X Resolution  = 0.95846665[Hz]
X Sweep       = 31.40703518[kHz]
X Sweep Clipped = 25.12562814[kHz]
Irr Domain    = Proton
Irr Freq      = 399.78219838[MHz]
Irr Offset    = 5[ppm]
Clipped       = FALSE
Scans         = 1600
Total Scans   = 1600

Relaxation Delay = 2[s]
Recvr Gain       = 60
Temp Get         = 20.9[dC]
X 90 Width      = 8.28[us]
X Acq Time      = 1.04333312[s]
X Angle         = 30[deg]
X Atn           = 4.1[dB]
X Pulse         = 2.76[us]
Irr Atn Dec     = 21.86[dB]
Irr Atn Noe    = 21.86[dB]
Irr Noise       = WALTZ
Irr Pwidth     = 0.115[ms]
Decoupling      = TRUE
Initial Wait    = 1[s]
Noe             = TRUE
Noe Time        = 2[s]
Repetition Time = 3.04333312[s]
  
```

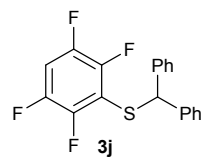

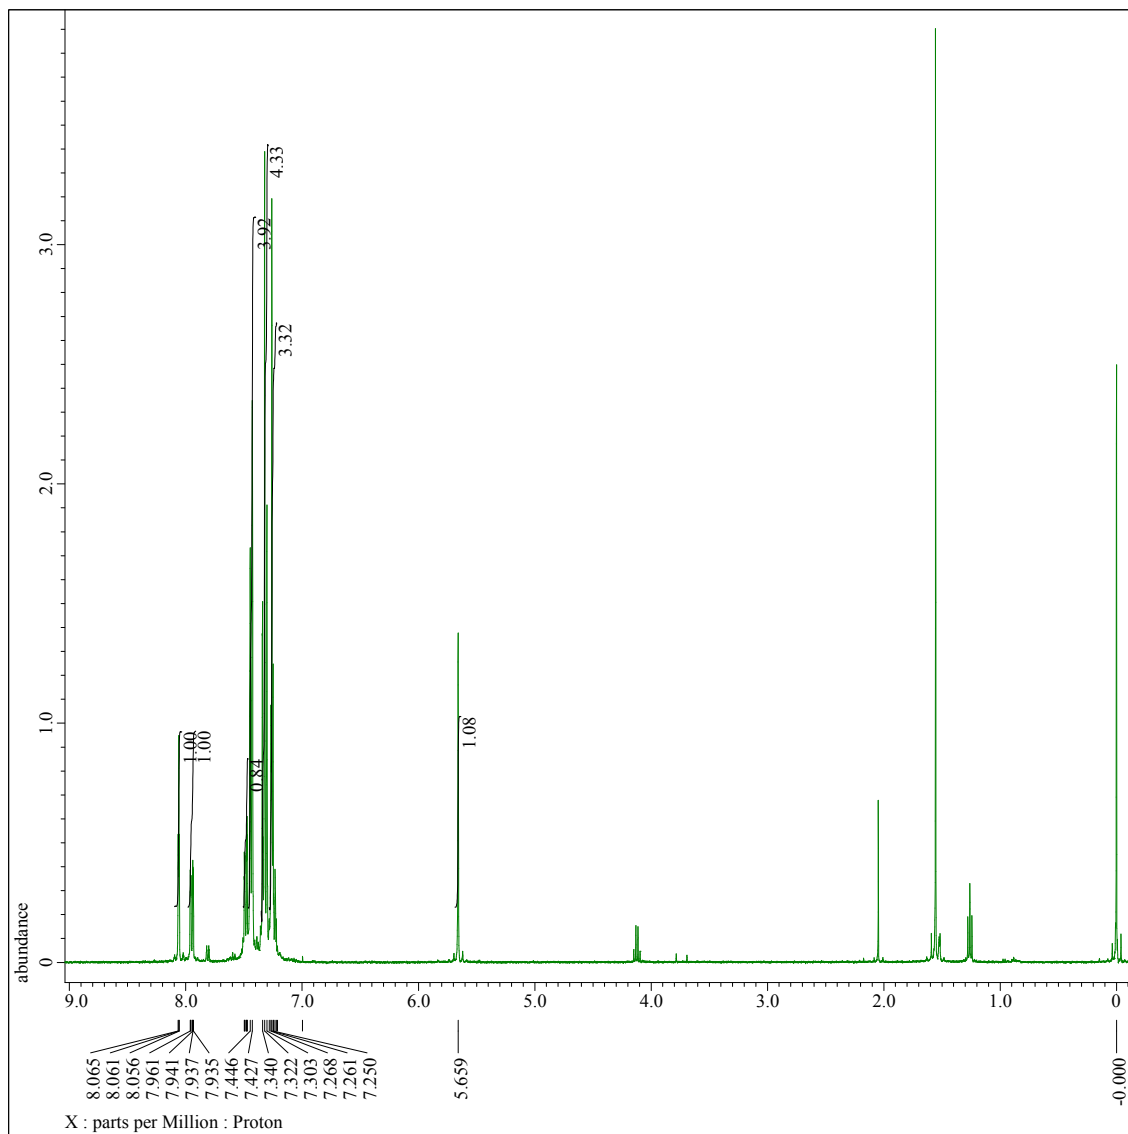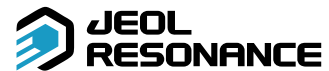

```

Filename      = M-HH6-14-2_Proton-1-7.jdf
Author       = delta
Experiment   = proton.jxp
Sample Id    = M-HH6-14-2
Solvent      = CHLOROFORM-D
Creation Time = 14-APR-2015 17:03:59
Revision Time = 15-SEP-2015 11:34:21
Current Time  = 15-SEP-2015 11:42:21

Comment      = single_pulse
Data Format   = 1D_COMPLEX
Dim Size     = 13107
Dim Title    = Proton
Dim Units    = [ppm]
Dimensions   = X
Site         = JNM-ECS400
Spectrometer = DELTA2_NMR

Field Strength = 9.389766[T] (400[MHz])
X_Acq_Duration = 2.18365952[s]
X_Domain       = 1H
X_Freq         = 399.78219838[MHz]
X_Offset       = 5[ppm]
X_Points       = 16384
X_Prescans     = 1
X_Resolution   = 0.45794685[Hz]
X_Sweep        = 7.5030012[kHz]
X_Sweep_Clippped = 6.00240096[kHz]
Irr_Domain     = Proton
Irr_Freq       = 399.78219838[MHz]
Irr_Offset     = 5[ppm]
Tri_Domain     = Proton
Tri_Freq       = 399.78219838[MHz]
Tri_Offset     = 5[ppm]
Clipped        = FALSE
Scans          = 8
Total_Scans    = 8

Relaxation_Delay = 5[s]
Recvr Gain       = 48
Temp_Get         = 20.2[dC]
X_90_Width      = 9.72[us]
X_Acq_Time      = 2.18365952[s]
X_Angle         = 45[deg]
X_Atn           = 0.4[dB]
X_Pulse         = 4.86[us]
Irr_Mode        = Off
Tri_Mode        = Off
Dante_Presat    = FALSE
Initial_Wait    = 1[s]
Repetition_Time = 7.18365952[s]

```

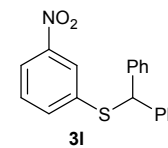

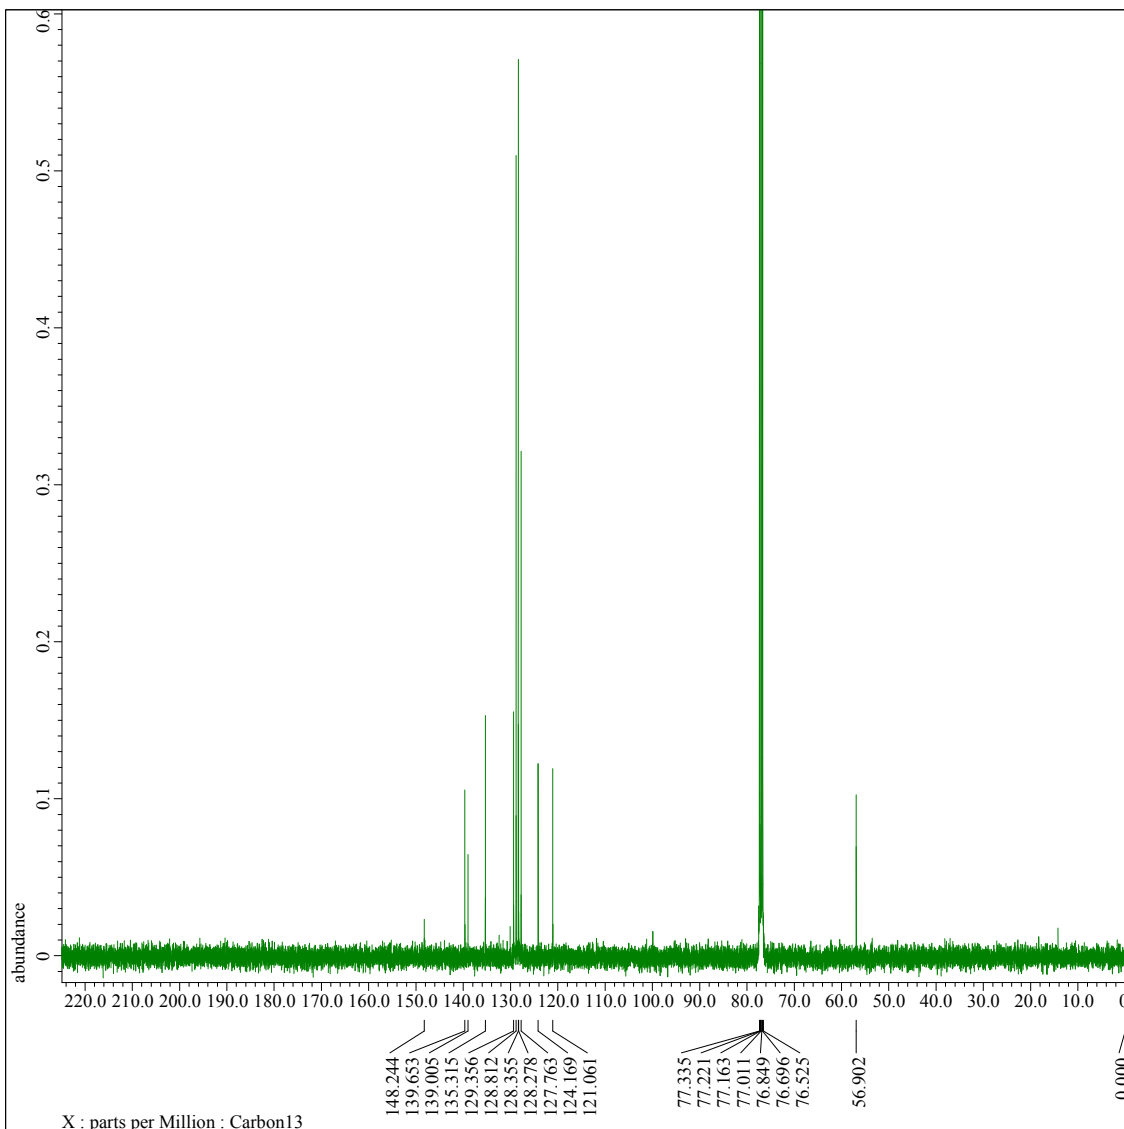

```

Filename      = mto14-2_Carbon-1-4.jdf
Author       = delta
Experiment   = carbon.jxp
Sample Id    = mto14-2
Solvent      = CHLOROFORM-D
Creation Time = 1-MAY-2015 00:05:57
Revision Time = 7-JUL-2015 14:21:51
Current Time  = 7-JUL-2015 14:22:08

Comment      = single pulse decoupled gat
Data Format   = 1D COMPLEX
Dim Size     = 26214
Dim Title    = Carbon13
Dim Units    = [ppm]
Dimensions   = X
Site         = JNM-ECS400
Spectrometer = DELTA2_NMR

Field Strength = 9.389766[T] (400[MHz])
X Acq Duration = 1.04333312[s]
X Domain      = 13C
X Freq        = 100.52530333[MHz]
X Offset      = 100[ppm]
X Points      = 32768
X Prescans    = 4
X Resolution  = 0.95846665[Hz]
X Sweep      = 31.40703518[kHz]
X Sweep Clipped = 25.12562814[kHz]
Irr Domain    = Proton
Irr Freq      = 399.78219838[MHz]
Irr Offset    = 5[ppm]
Clipped      = FALSE
Scans         = 1600
Total Scans   = 1600

Relaxation Delay = 2[s]
Recvr Gain       = 60
Temp Get         = 20.8[dC]
X 90 Width      = 8.28[us]
X Acq Time      = 1.04333312[s]
X Angle         = 30[deg]
X Atn           = 4.1[dB]
X Pulse         = 2.76[us]
Irr Atn Dec     = 21.86[dB]
Irr Atn Noe     = 21.86[dB]
Irr Noise       = WALTZ
Irr Pwidth      = 0.115[ms]
Decoupling      = TRUE
Initial Wait    = 1[s]
Noe              = TRUE
Noe Time        = 2[s]
Repetition Time = 3.04333312[s]
  
```

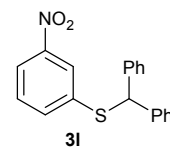



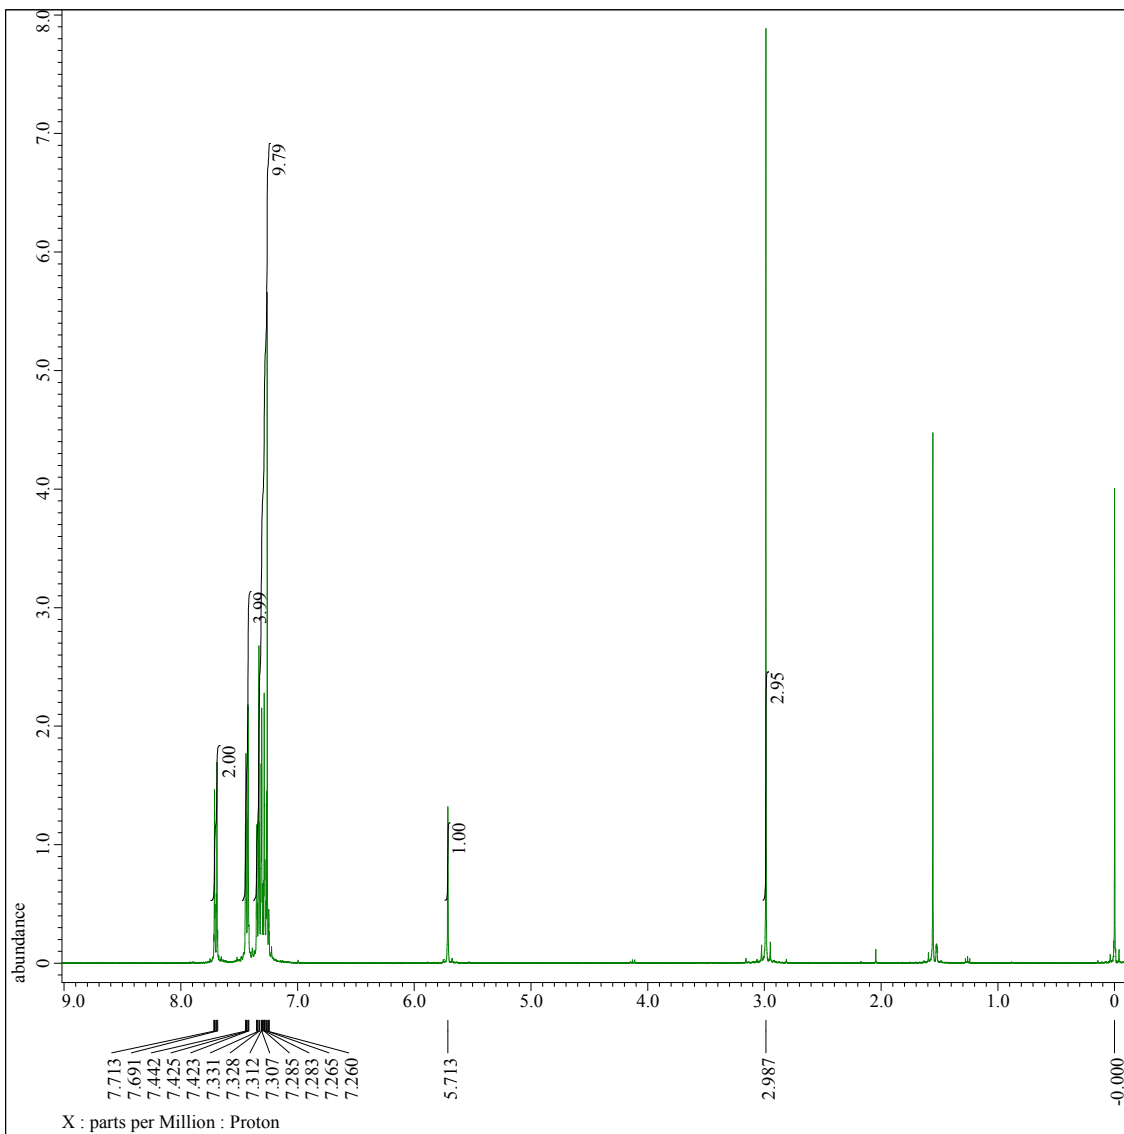

```

Filename      = M-HH6-14-3_Proton-1-5.jdf
Author       = delta
Experiment   = proton.jxp
Sample Id    = M-HH6-14-3
Solvent      = CHLOROFORM-D
Creation Time = 14-APR-2015 17:16:06
Revision Time = 15-SEP-2015 11:47:09
Current Time  = 15-SEP-2015 11:47:20

Comment      = single_pulse
Data Format   = 1D_COMPLEX
Dim Size     = 13107
Dim Title    = Proton
Dim Units    = [ppm]
Dimensions   = X
Site         = JNM-ECS400
Spectrometer = DELTA2_NMR

Field Strength = 9.389766[T] (400[MHz])
X Acq Duration = 2.18365952[s]
X Domain       = 1H
X Freq         = 399.78219838[MHz]
X Offset       = 5[ppm]
X Points       = 16384
X Freqscans    = 1
X Resolution   = 0.45794685[Hz]
X Sweep        = 7.5030012[kHz]
X Sweep_Clippped = 6.00240096[kHz]
Irr Domain     = Proton
Irr Freq       = 399.78219838[MHz]
Irr Offset     = 5[ppm]
Tri Domain     = Proton
Tri Freq       = 399.78219838[MHz]
Tri Offset     = 5[ppm]
Clipped        = FALSE
Scans          = 8
Total_Scans    = 8

Relaxation_Delay = 5[s]
Recvr Gain       = 48
Temp_Get         = 21.2[dC]
X_90_Width      = 9.72[us]
X Acq Time       = 2.18365952[s]
X Angle          = 45[deg]
X Atn           = 0.4[dB]
X Pulse         = 4.86[us]
Irr_Mode        = Off
Tri_Mode        = Off
Dante_Presat    = FALSE
Initial_Wait    = 1[s]
Repetition_Time = 7.18365952[s]

```

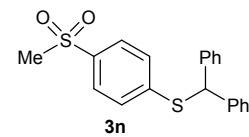

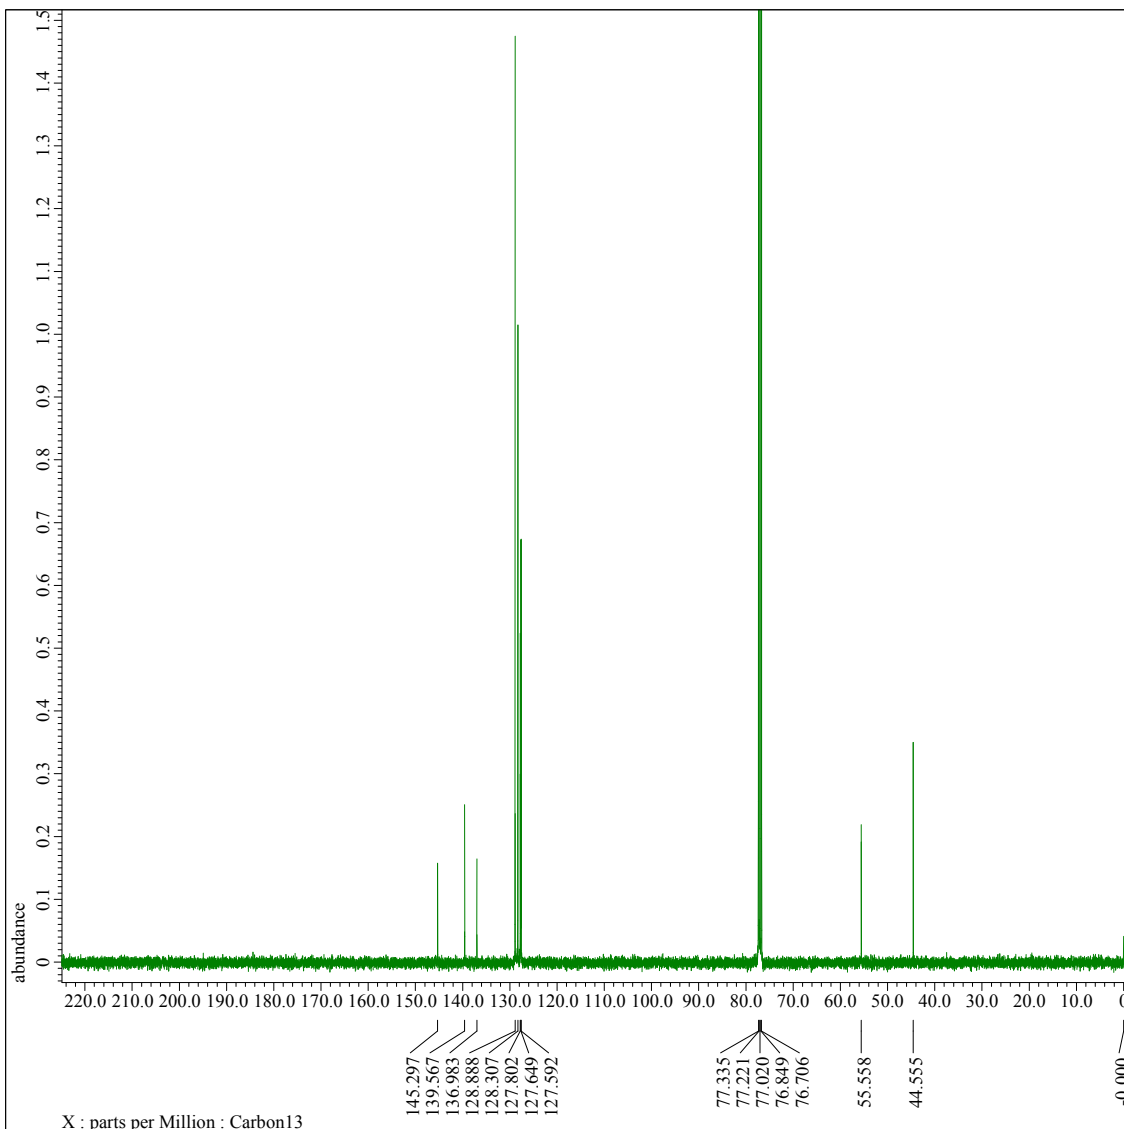

X : parts per Million : Carbon13

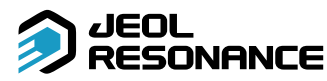

```

Filename      = 14-3_Carbon-1-2.jdf
Author       = delta
Experiment   = carbon.jxp
Sample Id    = 14-3
Solvent      = CHLOROFORM-D
Creation Time = 23-JUN-2015 19:41:37
Revision Time = 24-JUN-2015 11:25:28
Current Time  = 7-JUL-2015 14:23:47

Comment      = single pulse decoupled gat
Data Format   = 1D COMPLEX
Dim Size     = 26214
Dim Title    = Carbon13
Dim Units    = [ppm]
Dimensions   = X
Site         = JNM-ECS400
Spectrometer = DELTA2_NMR

Field Strength = 9.389766[T] (400[MHz])
X Acq Duration = 1.04333312[s]
X Domain      = 13C
X Freq        = 100.52530333[MHz]
X Offset      = 100[ppm]
X Points      = 32768
X Prescans    = 4
X Resolution  = 0.95846665[Hz]
X Sweep       = 31.40703518[kHz]
X Sweep Clipped = 25.12562814[kHz]
Irr Domain    = Proton
Irr Freq      = 399.78219838[MHz]
Irr Offset    = 5[ppm]
Clipped       = FALSE
Scans         = 1024
Total Scans   = 1024

Relaxation Delay = 2[s]
Recvr Gain      = 60
Temp Get        = 20.2[dC]
X 90 Width     = 8.28[us]
X Acq Time     = 1.04333312[s]
X Angle        = 30[deg]
X Atn          = 4.1[dB]
X Pulse        = 2.76[us]
Irr Atn Dec    = 21.86[dB]
Irr Atn Noe    = 21.86[dB]
Irr Noise      = WALTZ
Irr Pwidth     = 0.115[ms]
Decoupling     = TRUE
Initial Wait   = 1[s]
Noe            = TRUE
Noe Time       = 2[s]
Repetition Time = 3.04333312[s]
  
```

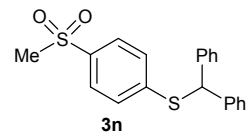

Supplement: c5ob01717c1.pdf [file c5ob01717c1.pdf]
